# Supplementary material for: Prevalence of anxiety and depressive symptoms and impact on self-management among adults with chronic conditions in Chicago, Illinois, USA, during the COVID-19 pandemic: a cross-sectional survey
Source: PubMed Central journal article supplement — BMJ Open. 2022 Jan 7;12(1):e052495. doi: 10.1136/bmjopen-2021-052495 (PMC8743840; doi:10.1136/bmjopen-2021-052495), 2022-01-07
Supplement: bmjopen-2021-052495.draft_revisions.pdf [file bmjopen-2021-052495.draft_revisions.pdf]

# BMJ Open

BMJ Open is committed to open peer review. As part of this commitment we make the peer review history of every article we publish publicly available.

When an article is published we post the peer reviewers' comments and the authors' responses online. We also post the versions of the paper that were used during peer review. These are the versions that the peer review comments apply to.

The versions of the paper that follow are the versions that were submitted during the peer review process. They are not the versions of record or the final published versions. They should not be cited or distributed as the published version of this manuscript.

BMJ Open is an open access journal and the full, final, typeset and author-corrected version of record of the manuscript is available on our site with no access controls, subscription charges or pay-per-view fees (<http://bmjopen.bmj.com>).

If you have any questions on BMJ Open's open peer review process please email [info.bmjopen@bmj.com](mailto:info.bmjopen@bmj.com)

# BMJ Open

## Prevalence of clinically-relevant anxiety and depressive symptoms and impact on self-management of chronic conditions amidst COVID-19: a cross-sectional analysis

|                               |                                                                                                                                                                                                                                                                                                                                                                                                                                                                                                                                                                                                                                                                                                                                                                                                                                        |
|-------------------------------|----------------------------------------------------------------------------------------------------------------------------------------------------------------------------------------------------------------------------------------------------------------------------------------------------------------------------------------------------------------------------------------------------------------------------------------------------------------------------------------------------------------------------------------------------------------------------------------------------------------------------------------------------------------------------------------------------------------------------------------------------------------------------------------------------------------------------------------|
| Journal:                      | <i>BMJ Open</i>                                                                                                                                                                                                                                                                                                                                                                                                                                                                                                                                                                                                                                                                                                                                                                                                                        |
| Manuscript ID                 | bmjopen-2021-052495                                                                                                                                                                                                                                                                                                                                                                                                                                                                                                                                                                                                                                                                                                                                                                                                                    |
| Article Type:                 | Original research                                                                                                                                                                                                                                                                                                                                                                                                                                                                                                                                                                                                                                                                                                                                                                                                                      |
| Date Submitted by the Author: | 19-Apr-2021                                                                                                                                                                                                                                                                                                                                                                                                                                                                                                                                                                                                                                                                                                                                                                                                                            |
| Complete List of Authors:     | Lovett, Rebecca; Northwestern University Feinberg School of Medicine, Department of General Internal Medicine & Geriatrics<br>Opsasnick, Lauren; Northwestern University Feinberg School of Medicine<br>Russell, Andrea; Northwestern University Feinberg School of Medicine, Department of General Internal Medicine & Geriatrics<br>Yoon, Esther; Northwestern University Feinberg School of Medicine, Department of General Internal Medicine & Geriatrics<br>Weiner-Light, Sophia; Northwestern University Feinberg School of Medicine, Department of General Internal Medicine & Geriatrics<br>Serper, Marina; University of Pennsylvania Perelman School of Medicine, Department of Medicine<br>Cooper Bailey, Stacy; Northwestern University<br>Wolf, Michael; Northwestern University, Department of General Internal Medicine |
| Keywords:                     | COVID-19, MENTAL HEALTH, PRIMARY CARE                                                                                                                                                                                                                                                                                                                                                                                                                                                                                                                                                                                                                                                                                                                                                                                                  |
|                               |                                                                                                                                                                                                                                                                                                                                                                                                                                                                                                                                                                                                                                                                                                                                                                                                                                        |

SCHOLARONE™  
Manuscripts

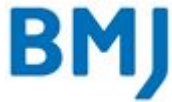

I, the Submitting Author has the right to grant and does grant on behalf of all authors of the Work (as defined in the below author licence), an exclusive licence and/or a non-exclusive licence for contributions from authors who are: i) UK Crown employees; ii) where BMJ has agreed a CC-BY licence shall apply, and/or iii) in accordance with the terms applicable for US Federal Government officers or employees acting as part of their official duties; on a worldwide, perpetual, irrevocable, royalty-free basis to BMJ Publishing Group Ltd ("BMJ") its licensees and where the relevant Journal is co-owned by BMJ to the co-owners of the Journal, to publish the Work in this journal and any other BMJ products and to exploit all rights, as set out in our [licence](#).

The Submitting Author accepts and understands that any supply made under these terms is made by BMJ to the Submitting Author unless you are acting as an employee on behalf of your employer or a postgraduate student of an affiliated institution which is paying any applicable article publishing charge ("APC") for Open Access articles. Where the Submitting Author wishes to make the Work available on an Open Access basis (and intends to pay the relevant APC), the terms of reuse of such Open Access shall be governed by a Creative Commons licence – details of these licences and which [Creative Commons](#) licence will apply to this Work are set out in our licence referred to above.

Other than as permitted in any relevant BMJ Author's Self Archiving Policies, I confirm this Work has not been accepted for publication elsewhere, is not being considered for publication elsewhere and does not duplicate material already published. I confirm all authors consent to publication of this Work and authorise the granting of this licence.

1  
2  
3 **Prevalence of clinically-relevant anxiety and depressive symptoms and impact on self-**  
4 **management of chronic conditions amidst COVID-19: a cross-sectional analysis**  
5

6 Rebecca M. Lovett<sup>1</sup>; Lauren Opsasnick<sup>1</sup>; Andrea Russell<sup>1</sup>; Esther Yoon<sup>1</sup>; Sophia Weiner-Light<sup>1</sup>;  
7 Marina Serper<sup>2</sup>; Stacy Cooper Bailey<sup>1</sup>; Michael S. Wolf<sup>1</sup>  
8  
9

10 <sup>1</sup>Department of General Internal Medicine & Geriatrics, Northwestern University Feinberg School  
11 of Medicine, Chicago, IL USA

12 <sup>2</sup>Division of Gastroenterology and Hepatology, Department of Medicine, University of  
13 Pennsylvania Perelman School of Medicine, Philadelphia, PA USA  
14  
15

16  
17  
18  
19 Corresponding Author Information:

20 Rebecca M. Lovett, PhD  
21 Division of General Internal Medicine & Geriatrics  
22 Northwestern University Feinberg School of Medicine  
23 750 North Lakeshore Drive, 10<sup>th</sup> Floor  
24 Chicago, IL 60611  
25 Phone: +1 (312) 503-3276  
26 Email: r-lovett@northwestern.edu  
27  
28  
29

30  
31 Abstract Word Count: 278/300

32 Manuscript Word Count: 3117/4000

33 Number of Tables: 3

34 Number of References: 28

35 Keywords: COVID-19, mental health, depression, anxiety, health self-management, healthcare  
36 utilization  
37  
38  
39  
40  
41  
42  
43  
44  
45  
46  
47  
48  
49  
50  
51  
52  
53  
54  
55  
56  
57  
58  
59  
60

**ABSTRACT**

**Objectives:** To determine the prevalence and factors associated with clinically-relevant anxiety and depressive symptoms among adults with high COVID-19 risk due to underlying health conditions during the acceleration phase of the U.S. pandemic. Secondly, to examine associations between mental health symptoms and COVID-related emotional distress, health self-management, and healthcare utilization.

**Design:** Cross-sectional analysis of Wave 3 (May 1 – 22, 2020) survey data from the ongoing Chicago COVID-19 and Comorbidities (C3) study.

**Setting:** Five academic internal medicine practices and two federally qualified health centers in Chicago, IL.

**Participants:** 565 adults aged 23 to 88 with one or more chronic conditions completing at least one prior C3 study Wave.

**Primary and secondary outcome measures:** Clinically-relevant anxiety and depressive symptoms were measured using Patient-Reported Outcomes Measurement Information System (PROMIS) short-forms and defined as T-scores of 63.2 and 59.9, respectively. Self-reported emotional and health-related responses to COVID-19 were measured through a combination of single-item questions and validated measures.

**Results:** Rates of clinically-relevant anxiety and depressive symptoms were 14% and 15%, respectively. Female gender was independently associated with greater risk for anxiety and depressive symptoms after controlling for other sociodemographic factors; low health activation was a significant predictor of anxiety. In adjusted multivariate analyses, anxiety and depressive symptoms were separately associated with greater worry about contracting COVID-19, higher levels of stress and loneliness related to the pandemic, poorer treatment adherence, as well as

1  
2  
3 greater avoidance of the doctor, and difficulty managing health and medications due to the  
4  
5 pandemic.  
6

7  
8 **Conclusions:** In addition to optimizing emotional well-being during the pandemic, adequately  
9  
10 identifying and addressing mental health concerns may also be an important factor to consider in  
11  
12 COVID-19 prevention and management among high-risk medical populations.  
13  
14  
15  
16  
17  
18  
19  
20  
21  
22  
23  
24  
25  
26  
27  
28  
29  
30  
31  
32  
33  
34  
35  
36  
37  
38  
39  
40  
41  
42  
43  
44  
45  
46  
47  
48  
49  
50  
51  
52  
53  
54  
55  
56  
57  
58  
59  
60

## ARTICLE SUMMARY

### Strengths and Limitations of this Study

- A major strength of this study was the intentional focus on adults with one or more chronic medical conditions, a population at higher risk for adverse COVID-19 outcomes.
- Our sample was diverse by race/ethnicity, SES, and health literacy, increasing generalizability.
- Mental health symptoms were based on self-report, not diagnostic assessment.
- The cross-sectional nature of the analysis and lack of information on mental health functioning prior to the COVID-19 pandemic limits the ability to infer causation.

### Funding

This work was supported by grants R01AG030611, R01AG046352, R01DK110172, R01NR015444, and P30AG059988 from the National Institutes of Health (NIH). The funding organization had no role in the design of the study and collection, analysis, and interpretation of data, and in writing the manuscript.

### Competing Interests

MS reports personal fees from BioVie outside the submitted work. SCB reports grants from the NIH during the conduct of the study; grants from Merck, the NIH, the Gordon and Betty Moore Foundation, and Eli Lilly outside the submitted work; grants and personal fees from Pfizer outside the submitted work; and personal fees from Sanofi, University of Westminster, and Luto outside the submitted work. MSW reports grants from the NIH during the conduct of the study; grants from Merck, the Gordon and Betty Moore Foundation, the NIH, and Eli Lilly outside the submitted work; and personal fees from Sanofi, Pfizer, and Luto outside the submitted work. Authors not named here have disclosed no conflicts of interest.

**Data Sharing**

Data available upon reasonable request to the corresponding author.

For peer review only



## INTRODUCTION

The rapid emergence and ongoing spread of the SARS-CoV-2 virus underlying the COVID-19 respiratory disease has resulted in an unprecedented disruption to the health and daily lives of Americans and poses a significant challenge to mental health. Since the U.S. onset of the pandemic in March 2020, confirmed cases of COVID-19 have dramatically increased,[1] fueling fear of contagion and concerns for healthcare shortages. Social distancing and shelter-in-place (SIP) restrictions, while vital to mitigate the virus' spread, have also resulted in significant economic and social challenges,[2] such as loss of livelihoods and family/community connectedness, which may also inadvertently increase emotional distress. Results from several population-based surveys have indicated Americans overall are reporting higher rates of loneliness and stress,[3] as well as symptoms of depression and anxiety since the pandemic first began.[4]

However, comparatively little research has focused on how the COVID-19 pandemic has affected the mental health of adults with chronic medical conditions, who are considered to be at an elevated risk for severe illness should they contract the virus, and for whom public health authorities have recommended especially close adherence to COVID-19 safety precautions.[5] Early evidence has found support for declines in mental health and well-being among this group.[6] However, factors contributing to mental health risk, as well the significance of these changes, including impact on daily function, are unclear. In particular, it is necessary to better understand the degree to which significantly elevated anxiety and depressive symptoms may interfere with management of health and utilization of healthcare services during the COVID-19 pandemic, for instance through adequate adherence to drug regimens, engagement in recommended health behaviors, and maintaining access to healthcare. Such investigations are of particular importance

1  
2  
3 in this population, for whom the ability to continue to successfully self-manage pre-existing health  
4 concerns during the pandemic may help serve to decrease COVID-19 risk.[5]  
5  
6

7  
8 The objective of the present study was thus two-fold. First, we sought to determine the  
9 prevalence and predictors of clinically-relevant depressive and anxiety symptoms during the early  
10 stages of the 2020 U.S. COVID-19 outbreak, within a population at increased COVID-19 risk due  
11 to medical comorbidity. Second, we examined associations between significant anxiety and  
12 depressive symptoms with rates of worry, stress, and loneliness related to the pandemic, in addition  
13 to health self-management and utilization of healthcare services. Findings from this investigation  
14 may inform the need for targeted mental health screening and intervention efforts related to the  
15 COVID-19 pandemic among vulnerable populations, or offer insight on the mental health effects  
16 of future public health emergencies should they arise.  
17  
18  
19  
20  
21  
22  
23  
24  
25  
26  
27

## 28 **METHODS**

29  
30  
31 The Chicago COVID-19 Comorbidities (C3) Study is an ongoing longitudinal, telephone-  
32 based survey examining attitudes and behaviors related to the COVID-19 pandemic. An in-depth  
33 explanation of the methods and details of the study have been published elsewhere.[7] However  
34 in brief, participants were originally recruited from one of four current National Institute of Health-  
35 sponsored research projects across Chicago, Illinois (R01AG030611; R01NR015444;  
36 R01AG046352; R01DK110172).[8-10] Objectives and methods of the parent studies varied,  
37 however, studies were selected for the C3 Study if they enrolled mostly middle-aged or older adults  
38 with at least one chronic condition. The goal was to create a cohort of participants considered to  
39 be at higher risk for an adverse outcome should they contract COVID-19. All participants had  
40 given prior consent to be contacted for future research opportunities.  
41  
42  
43  
44  
45  
46  
47  
48  
49  
50  
51  
52  
53  
54  
55  
56  
57  
58  
59  
60

1  
2  
3 Data collection has occurred over three waves approximately one month apart, beginning  
4  
5 in the middle of March at the U.S. outset of the COVID-19 outbreak. Data for this analysis was  
6  
7 collected during Wave 3 (May 1 – 22, 2020), as standardized measures of psychological  
8  
9 functioning were introduced into the study battery at this timepoint.  
10  
11

### 12 **Ethics Approval**

13  
14 The C3 protocol was reviewed and approved by the Northwestern University Institutional  
15  
16 Review Board (IRB) prior to each study wave as a modification for each individual parent study  
17  
18 (Wave 3 IRB Approval numbers: STU00026255-MOD0062, STU00204465-MOD0034,  
19  
20 STU00203777-MOD0032, STU00201639-MOD0039). The cohort remains active with  
21  
22 additional planned survey waves.  
23  
24  
25

### 26 **Patient and Public Involvement**

27  
28 Patients or the public were not involved in the design, or conduct, or reporting, or  
29  
30 dissemination plans of the C3 Study.  
31  
32

### 33 **Sample**

34  
35 Specific eligibility criteria for the parent studies varied, however all participants were  
36  
37 recruited from primary care settings and reported the presence of at least one chronic health  
38  
39 condition. To ensure any data obtained from the parent study was current, only participants who  
40  
41 had completed their most recent parent study interview in 2018 or later were eligible for inclusion  
42  
43 in the C3 survey. Across studies, common and previously assessed exclusion criteria included the  
44  
45 presence of a visual, hearing, or cognitive impairment interfering with study participation.  
46  
47  
48

### 49 **Procedure**

Trained research interviewers contacted eligible participants by telephone to invite them to participate in the C3 survey. The survey took approximately 30-40 minutes to complete, and adults were then mailed a \$15 gift card for their involvement.

### **Measurement**

Demographic characteristics (age, sex, race/ethnicity), socioeconomic status (income, employment, educational attainment), married status, insurance type, and self-reported chronic conditions were determined from participants' most recent parent study interview. Health literacy and health activation were also measured at their last parent study visit and assessed using the Newest Vital Sign (NVS)[11] and Consumer Health Activation Index (CHAI),[12] respectively. Previous research has demonstrated associations between these factors and measures of physical and mental health.[13] A single question was also used across studies to gauge self-reported health (excellent, very good, good, fair, poor).

### ***Clinically-Relevant Anxiety and Depressive Symptoms***

Current psychological functioning was assessed using the validated Patient-Reported Outcomes Measurement Information System (PROMIS) four-item short-form questionnaires for anxiety and depression.[14] Raw scores are transformed into T-scores, which have a mean of 50 (Standard Deviation (SD) 10), and are normed against the general U.S. population. They have good agreement with legacy measures of mental health functioning such as the GAD-7 and PHQ-9,[15, 16] and have been used to assess mental health among various medical populations.[17] Higher scores represent greater symptom burden. Thresholds previously proposed in the literature and corresponding to symptom levels with clinical significance (i.e. moderate or greater symptom severities indicating probable anxiety or depression) were utilized.[15, 16] This translated to a T-

score equal to or greater than 63.2 and 59.9 for clinically-relevant anxiety and depressive symptoms, respectively.

### ***COVID-Related Emotional Distress***

Emotional distress due to the pandemic was assessed using single-item questions asking about worry about contracting COVID-19 (not at all worried, a little worried, somewhat worried, very worried), as well as how often participants felt stressed or lonely due to COVID-19 in the past week (never, some of the time, most of the time, all of the time).

### ***Self-Management of Health***

Two single-item questions were used to assess perceived difficulty managing health and accessing and remembering to take medications during the COVID-19 pandemic (1-10 scale, of increasing difficulty). Barriers to general medication adherence was measured using the 12-item Adherence Starts with Knowledge (ASK-12) survey (range 12-60, higher scores represent more barriers).[18] Change in physical activity and alcohol use over the past month compared to typical levels were each assessed with a single item (more than typical, less than typical, the same).

### ***Healthcare Utilization***

Healthcare utilization was measured through two single-item questions (yes/no) asking whether participants had missed or cancelled any medical appointments, or avoided the emergency department or urgent care due to worry about contracting COVID-19. Comfort visiting the doctor once SIP restrictions ended was also assessed (very comfortable, somewhat comfortable, not that comfortable, not comfortable at all).

### ***Statistical Analysis***

Descriptive statistics (mean, SD, frequency (%)) were conducted for all participant characteristics, overall and by the presence or absence (yes/no) of clinically-relevant depressive

1  
2  
3 and anxiety symptoms. Cross-sectional associations between participant characteristics and  
4  
5 anxiety and depression symptoms were first analyzed using chi-square and independent samples  
6  
7 t-tests, as appropriate, then modeled using multivariate logistic regressions, adjusting for any  
8  
9 characteristics that were significant in bivariate analyses. This process was then repeated, but  
10  
11 instead examining associations between anxiety and depression with each of our outcomes of  
12  
13 interest. Covariate selection for multivariate models at this stage was based on the literature as  
14  
15 well as prior investigations using this cohort,[7] and included age, sex, race/ethnicity, income,  
16  
17 health literacy, health activation, self-reported health, and date of interview. Additionally, all  
18  
19 multivariate models were adjusted for parent study, to control for any between-subject correlation  
20  
21 within a specific study. For all multivariate models, anxiety and depression were examined as  
22  
23 separate exposure variables; least squared means (LS Means) were obtained for continuous  
24  
25 outcomes using a generalized linear model (GLM), whereas for categorical outcomes a  
26  
27 multivariate Poisson distribution was used to estimate relative risk (RR) estimates in lieu of odds  
28  
29 ratios for ease of interpretation.[19] Pairwise deletion was used, and associations were determined  
30  
31 to be statistically significant if they had a  $p$  value of  $< 0.05$ . Descriptive and bivariate analyses  
32  
33 were performed using STATA SE software, version 15 (College Station, TX), while multivariate  
34  
35 analyses were performed in SAS Version 9.4 (SAS Institute Inc.).  
36  
37  
38  
39  
40  
41

## 42 RESULTS

43  
44 A total of 565 participants completed Wave 3. Of the 630 participants who completed the  
45  
46 survey at Wave 1 and were eligible for participation in Wave 3, 47 were unable to be contacted  
47  
48 and 18 declined participation, resulting in an 89.7% overall retention rate. Participant  
49  
50 characteristics, overall and by the presence of clinically-relevant anxiety and depression, are listed  
51  
52 in Table 1. Our sample was older, primarily female, and diverse by race/ethnicity and  
53  
54  
55  
56  
57  
58  
59

## MENTAL HEALTH &amp; COVID-19 IN HIGH RISK ADULTS

12

socioeconomic status. All participants had at least one chronic health condition, while nearly two-thirds reported having three or more. Approximately a quarter of participants self-rated their health as fair to poor.

*Table 1. Sample Characteristics, Overall and by Clinically-relevant Anxiety and Depressive Symptoms*

| Variable                             | Wave 3 C3<br>Sample<br>N=565 | Clinically-relevant Anxiety<br>Symptoms<br>N=81 |             |         | Clinically-relevant Depressive<br>Symptoms<br>N=84 |             |         |
|--------------------------------------|------------------------------|-------------------------------------------------|-------------|---------|----------------------------------------------------|-------------|---------|
|                                      |                              | Yes                                             | No          | p-value | Yes                                                | No          | p-value |
| Age, M (SD)                          | 62.3 (10.9)                  | 61.2 (10.1)                                     | 62.5 (11.0) | 0.31    | 62.5 (11.5)                                        | 62.3 (10.8) | 0.87    |
| Age Group, %                         |                              |                                                 |             | 0.33    |                                                    |             | 0.99    |
| < 60                                 | 36.3                         | 40.7                                            | 35.7        |         | 35.7                                               | 36.5        |         |
| 60 - 69                              | 37.0                         | 39.5                                            | 36.7        |         | 36.9                                               | 36.7        |         |
| ≥ 70                                 | 26.7                         | 19.8                                            | 27.6        |         | 27.4                                               | 26.7        |         |
| Gender, %                            |                              |                                                 |             | <0.001  |                                                    |             | <0.001  |
| Female                               | 61.4                         | 81.7                                            | 57.9        |         | 78.6                                               | 58.3        |         |
| Male                                 | 38.6                         | 18.5                                            | 42.1        |         | 21.4                                               | 41.8        |         |
| Race, %                              |                              |                                                 |             | 0.06    |                                                    |             | 0.08    |
| Latinx                               | 21.9                         | 30.0                                            | 20.4        |         | 31.3                                               | 20.3        |         |
| Non-Latinx White                     | 45.1                         | 36.3                                            | 46.5        |         | 34.9                                               | 46.8        |         |
| Non- Latinx Black                    | 29.8                         | 27.5                                            | 30.3        |         | 28.9                                               | 29.9        |         |
| Other                                | 3.2                          | 6.3                                             | 2.7         |         | 4.8                                                | 2.3         |         |
| Below Poverty Level, %               |                              |                                                 |             | 0.003   |                                                    |             | 0.001   |
| Yes                                  | 29.2                         | 43.2                                            | 26.7        |         | 44.1                                               | 26.5        |         |
| No                                   | 70.8                         | 56.8                                            | 73.3        |         | 55.9                                               | 73.5        |         |
| Marital Status, %                    |                              |                                                 |             | 0.29    |                                                    |             | 0.06    |
| Married                              | 39.9                         | 34.3                                            | 40.9        |         | 30.3                                               | 41.7        |         |
| Unmarried                            | 60.1                         | 65.7                                            | 59.1        |         | 69.7                                               | 58.3        |         |
| Health Insurance, %                  |                              |                                                 |             | 0.007   |                                                    |             | 0.008   |
| Medicare                             | 16.1                         | 11.1                                            | 16.8        |         | 16.7                                               | 16.1        |         |
| Medicaid                             | 12.8                         | 23.5                                            | 11.0        |         | 22.6                                               | 11.1        |         |
| Private                              | 25.0                         | 18.5                                            | 26.2        |         | 15.5                                               | 26.6        |         |
| Medicare + Private                   | 29.6                         | 24.7                                            | 30.4        |         | 23.8                                               | 30.8        |         |
| Medicare + Medicaid                  | 16.5                         | 22.2                                            | 15.6        |         | 21.4                                               | 15.5        |         |
| Self-pay/None                        | 0.0                          | 0.0                                             | 0.0         |         | 0.0                                                | 0.0         |         |
| Primary Care Setting, %              |                              |                                                 |             | 0.006   |                                                    |             | 0.006   |
| Academic                             | 68.7                         | 55.6                                            | 71.0        |         | 56.0                                               | 71.0        |         |
| Federally Qualified<br>Health Center | 31.3                         | 44.4                                            | 29.1        |         | 44.1                                               | 29.0        |         |
| Employment Status, %                 |                              |                                                 |             | 0.15    |                                                    |             | 0.03    |
| Working for Pay                      | 30.1                         | 23.5                                            | 31.4        |         | 20.2                                               | 31.8        |         |
| Not Working<br>(Retired/Unemployed)  | 69.9                         | 76.5                                            | 68.6        |         | 79.8                                               | 68.2        |         |
| Health Literacy, %                   |                              |                                                 |             | 0.13    |                                                    |             | 0.05    |
| Low                                  | 23.4                         | 28.4                                            | 22.4        |         | 27.4                                               | 22.8        |         |
| Marginal                             | 23.2                         | 28.4                                            | 22.2        |         | 31.0                                               | 21.7        |         |
| Adequate                             | 53.4                         | 43.2                                            | 55.4        |         | 41.7                                               | 55.5        |         |
| Health Activation, %                 |                              |                                                 |             | <0.001  |                                                    |             | 0.02    |
| Low                                  | 47.6                         | 70.4                                            | 43.8        |         | 59.5                                               | 45.3        |         |
| Adequate                             | 52.4                         | 29.6                                            | 56.2        |         | 40.5                                               | 54.7        |         |
| # Chronic Conditions, %              |                              |                                                 |             | 0.03    |                                                    |             | 0.05    |
| 1                                    | 24.2                         | 35.8                                            | 22.4        |         | 34.5                                               | 22.3        |         |
| 2                                    | 16.5                         | 13.6                                            | 16.8        |         | 11.9                                               | 17.1        |         |
| 3 or more                            | 59.3                         | 50.6                                            | 60.8        |         | 53.6                                               | 60.5        |         |

## MENTAL HEALTH &amp; COVID-19 IN HIGH RISK ADULTS

13

| Self-Reported Health, % |      |      |      | 0.21 |      | 0.02 |
|-------------------------|------|------|------|------|------|------|
| Excellent               | 9.0  | 6.2  | 9.5  |      | 4.8  | 9.8  |
| Very Good               | 29.9 | 37.0 | 28.6 |      | 27.4 | 30.3 |
| Good                    | 39.7 | 33.3 | 40.7 |      | 34.5 | 40.5 |
| Fair                    | 17.9 | 22.2 | 17.2 |      | 25.0 | 16.7 |
| Poor                    | 3.5  | 1.2  | 3.9  |      | 8.3  | 2.7  |

Fourteen percent (14%) of the sample reported the presence of clinically-relevant anxiety symptoms, while 15% endorsed significant depressive symptoms (Table 1). In multivariate models, female gender (RR 2.34, 95% Confidence Interval (CI) 1.32 – 4.13) and low health activation (RR 2.32, 95% CI 1.44 – 3.76) were independently associated with the presence of anxiety, while female gender (RR 1.95, 95% CI 1.14 – 3.33) was a significant predictor of depression.

### COVID-Related Emotional Distress

In bivariate analyses, anxiety and depression were both associated with more worry about contracting COVID-19, in addition to greater stress and loneliness as a result of the virus (Table 2). These associations remained significant in multivariate analyses (Table 3; Anxiety - Worry: RR 2.32, 95% CI 1.52 – 3.53; Stress: RR 4.93, 95% CI 3.20 – 7.59; Lonely: RR 3.82, 95% CI 2.21 – 6.60) (Depression - Worry: RR 1.67, 95% CI 1.10 – 2.54; Stress: RR 3.01, 1.96 – 4.61; Lonely: RR 5.37, 95% CI 3.21 – 8.98).

*Table 2. Associations with COVID-related Emotional Distress, Health Self-Management and Healthcare Utilization, Overall and by Clinically-relevant Anxiety and Depressive Symptoms*

| Variable                                                                                         | Wave 3 C3<br>Sample<br>N=565 | Clinically-relevant Anxiety<br>Symptoms<br>N=81 |      |         | Clinically-relevant Depressive<br>Symptoms<br>N=84 |      |         |
|--------------------------------------------------------------------------------------------------|------------------------------|-------------------------------------------------|------|---------|----------------------------------------------------|------|---------|
|                                                                                                  |                              | Yes                                             | No   | p-value | Yes                                                | No   | p-value |
| <b>COVID-related Emotional Distress</b>                                                          |                              |                                                 |      |         |                                                    |      |         |
| How worried are you about getting the coronavirus?, %                                            |                              |                                                 |      | <0.001  |                                                    |      | 0.01    |
| Not worried at all                                                                               | 10.7                         | 4.2                                             | 11.7 |         | 10.4                                               | 10.7 |         |
| A little worried                                                                                 | 22.8                         | 12.5                                            | 24.6 |         | 15.6                                               | 23.9 |         |
| Somewhat worried                                                                                 | 39.9                         | 34.7                                            | 40.7 |         | 32.5                                               | 41.2 |         |
| Very worried                                                                                     | 26.6                         | 48.6                                            | 23.0 |         | 41.7                                               | 24.2 |         |
| Over the past week, how often have you felt nervous or "stressed" because of the coronavirus?, % |                              |                                                 |      | <0.001  |                                                    |      | <0.001  |
| Never                                                                                            | 27.8                         | 4.9                                             | 31.7 |         | 7.1                                                | 31.5 |         |
| Some of the time                                                                                 | 54.0                         | 37.0                                            | 56.6 |         | 48.8                                               | 54.7 |         |
| Most of the time                                                                                 | 13.8                         | 40.7                                            | 9.3  |         | 26.2                                               | 11.7 |         |
| All of the time                                                                                  | 4.4                          | 17.3                                            | 2.3  |         | 17.9                                               | 2.1  |         |



## MENTAL HEALTH &amp; COVID-19 IN HIGH RISK ADULTS

14

|                                                                                                                                                     |            |            |            |      |        |            |            |        |
|-----------------------------------------------------------------------------------------------------------------------------------------------------|------------|------------|------------|------|--------|------------|------------|--------|
| Over the past week, how often have you felt alone or lonely because of the coronavirus?, %                                                          |            |            |            |      | <0.001 |            |            | <0.001 |
| Never                                                                                                                                               | 53.3       | 19.8       | 59.1       | 19.1 |        | 59.5       |            |        |
| Some of the time                                                                                                                                    | 34.5       | 46.9       | 32.2       | 41.7 |        | 33.0       |            |        |
| Most of the time                                                                                                                                    | 9.2        | 23.5       | 6.9        | 23.8 |        | 6.7        |            |        |
| All of the time                                                                                                                                     | 3.0        | 9.9        | 1.9        | 15.5 |        | 0.8        |            |        |
| <b>Health Self-Management</b>                                                                                                                       |            |            |            |      |        |            |            |        |
| Difficulty managing health due to the coronavirus (1-10), M (SD)                                                                                    | 4.1 (3.3)  | 5.8 (3.2)  | 3.8 (3.2)  |      | <0.001 | 5.8 (3.4)  | 3.8 (3.2)  | <0.001 |
| Difficulty with medications due to the coronavirus (1-10), M (SD)                                                                                   | 2.5 (2.9)  | 3.8 (3.3)  | 2.3 (2.7)  |      | <0.001 | 3.8 (3.4)  | 2.3 (2.7)  | <0.001 |
| ASK-12 total score (12-60), M (SD)                                                                                                                  | 20.2 (5.2) | 22.6 (5.7) | 19.8 (5.0) |      | <0.001 | 23.1 (5.3) | 19.7 (5.0) | <0.001 |
| Thinking about the last month, would you say your physical activity was more, less, or about the same than what is typical for you?, %              |            |            |            |      | 0.12   |            |            | 0.15   |
| More than typical                                                                                                                                   | 17.0       | 12.4       | 17.8       |      |        | 9.5        | 18.2       |        |
| Less than typical                                                                                                                                   | 54.9       | 65.4       | 53.1       |      |        | 60.7       | 54.1       |        |
| The same                                                                                                                                            | 28.1       | 22.2       | 29.1       |      |        | 29.8       | 27.8       |        |
| Thinking about the last month, would you say your alcohol consumption was more, less, or about the same than what is typical for you?, %            |            |            |            |      | 0.13   |            |            | 0.07   |
| More than typical                                                                                                                                   | 9.0        | 14.8       | 7.9        |      |        | 14.3       | 8.2        |        |
| Less than typical                                                                                                                                   | 23.8       | 22.2       | 24.1       |      |        | 28.6       | 22.8       |        |
| The same                                                                                                                                            | 67.2       | 63.0       | 68.0       |      |        | 57.1       | 69.0       |        |
| <b>Healthcare Utilization</b>                                                                                                                       |            |            |            |      |        |            |            |        |
| Over the past month, have you chosen to miss or cancel any medical appointments because you were too worried about getting the coronavirus?, %      |            |            |            |      | <0.001 |            |            | 0.01   |
| Yes                                                                                                                                                 | 22.0       | 38.3       | 19.3       |      |        | 32.1       | 20.1       |        |
| No                                                                                                                                                  | 78.0       | 61.7       | 80.7       |      |        | 67.9       | 79.9       |        |
| Over the past month, have you needed to go to the Emergency Room or urgent care but were too worried about getting the coronavirus to seek care?, % |            |            |            |      | 0.06   |            |            | 0.002  |
| Yes                                                                                                                                                 | 3.7        | 7.4        | 3.1        |      |        | 9.5        | 2.7        |        |
| No                                                                                                                                                  | 96.3       | 92.6       | 96.9       |      |        | 90.5       | 97.3       |        |
| Comfortable visiting your doctor in person once SIP lifted, %                                                                                       |            |            |            |      | <0.001 |            |            | 0.004  |
| Very comfortable                                                                                                                                    | 36.9       | 18.5       | 40.0       |      |        | 25.0       | 39.2       |        |
| Somewhat comfortable                                                                                                                                | 42.1       | 48.2       | 41.3       |      |        | 44.1       | 41.5       |        |
| Not that comfortable                                                                                                                                | 16.5       | 24.7       | 15.0       |      |        | 20.2       | 15.9       |        |
| Not comfortable at all                                                                                                                              | 4.4        | 8.6        | 3.8        |      |        | 10.7       | 3.4        |        |

SIP = Shelter-in-place

*Table 3. Multivariate Associations between Clinically Relevant Anxiety and Depressive Symptoms and COVID-related Outcomes*

| Variable                                 | Clinically-relevant Anxiety Symptoms |               |         | Clinically-relevant Depressive Symptoms |               |         |
|------------------------------------------|--------------------------------------|---------------|---------|-----------------------------------------|---------------|---------|
|                                          | Yes                                  | No            | P-value | Yes                                     | No            | P-value |
| <b>COVID-related Emotional Distress</b>  | Summary Value                        | Summary Value |         | Summary Value                           | Summary Value |         |
| Very worried about COVID 19, RR (95% CI) | 2.32 (1.52,3.53)                     | REF           | <0.001  | 1.67 (1.10,2.54)                        | REF           | 0.02    |
| Stressed due to COVID-19, RR (95% CI)    | 4.93 (3.20,7.59)                     | -             | <0.001  | 3.01 (1.96,4.61)                        | -             | <0.001  |
| Lonely due to COVID-19, RR (95% CI)      | 3.82 (2.21,6.60)                     | -             | <0.001  | 5.37 (3.21,8.98)                        | -             | <0.001  |

## MENTAL HEALTH &amp; COVID-19 IN HIGH RISK ADULTS

15

|                                                                                      | RR (95% CI)      |                  |        |                  |                  |        |  |
|--------------------------------------------------------------------------------------|------------------|------------------|--------|------------------|------------------|--------|--|
| <b>Health Self-Management</b>                                                        |                  |                  |        |                  |                  |        |  |
| Difficulty managing health due to COVID-19, LS Means (95% CI)                        | 6.09 (5.25,6.92) | 4.23 (3.70,4.75) | <0.001 | 5.85 (5.04,6.65) | 4.22 (3.70,4.75) | <0.001 |  |
| Difficulty with medications due to COVID-19, LS Means (95% CI)                       | 3.71 (2.98,4.43) | 2.47 (2.02,2.92) | <0.001 | 3.62 (2.92,4.31) | 2.45 (2.00,2.91) | <0.001 |  |
| ASK-12 Total Score, LS Means (95% CI)                                                | 21.8 (20.6,23.0) | 20.2 (19.4,21.0) | 0.01   | 22.3 (21.1,23.5) | 20.0 (19.3,20.8) | <0.001 |  |
| <b>Healthcare Utilization</b>                                                        |                  |                  |        |                  |                  |        |  |
| Missed or cancelled doctor appointment/Avoided ER visit due to COVID-19, RR (95% CI) | 1.62 (1.06,2.49) | -                | 0.03   | 1.54 (1.00,2.36) | -                | 0.05   |  |
| Very comfortable visiting doctor after SIP lifted, RR (95% CI)                       | 0.54 (0.31,0.93) | -                | 0.03   | 0.71 (0.44,1.13) | -                | 0.14   |  |

+ Models have been adjusted for age, gender, race, poverty level, health literacy, health activation, self-reported overall health, study number and date of interview

RR = Relative Risk; CI = Confidence Interval; LS = Least Square; SIP = Shelter-in-place

### Self-Management of Health

Both anxiety and depression were associated with greater reported difficulty managing health and medications during COVID-19, in addition to more barriers to medication adherence (Table 2). All associations remained significant in multivariate analyses (Table 3; Anxiety - Managing health: LS Means 6.09, 95% CI 5.25 – 6.92 vs. 4.23, 95% CI 3.70 – 4.75; Managing medications: LS Means 3.71, 95% CI 2.98 – 4.43 vs. 2.47, 95% CI 2.02 – 2.92; Medication adherence: LS Means 21.8, 95% CI 20.6 – 23.0 vs. 20.2, 95% CI 19.4 – 21.0) (Depression - Managing health: LS Means 5.85, 95% CI 5.04 – 6.65 vs. 4.22, 95% CI 3.84 – 4.70; Managing medications: LS Means 3.62, 95% CI 2.92 – 4.31 vs. 2.45, 95% CI 2.00 – 2.91; Medication adherence: LS Means 22.3, 95% CI 21.1– 23.5 vs. 20.0, 95% CI 19.3 – 20.8). Bivariate associations between anxiety and depressive symptoms with change in physical activity and alcohol use were non-significant.

### Healthcare Utilization

In bivariate analyses, both anxiety and depression were associated with avoidance of routine medical visits, as well as less comfort visiting the doctor once SIP is lifted (Table 2). Depression alone was associated with avoidance of emergency care. For anxiety, associations with avoiding doctor's visits (RR 1.62, 95% CI 1.06 – 2.49) and feeling very comfortable visiting the

1  
2  
3 doctor after SIP ends (RR 0.54, 95% CI 0.31 – 0.93)–were significant in multivariate analyses  
4  
5 (Table 3). For depression, only avoidance of doctor’s visits (RR 1.54, 95% CI 1.00 – 2.36)  
6  
7 remained significant in multivariate analysis (Table 3).  
8  
9

## 11 12 DISCUSSION

13  
14 Among a sample of mostly middle to older-age adults with one or more chronic conditions  
15 surveyed in the early phases of the COVID-19 crisis in the U.S. – when cases were rising and a  
16 SIP order was in effect in most states – clinically-relevant anxiety and depressive symptoms were  
17 relatively common, with rates of 14 and 15%, respectively. While still considerable, it should be  
18 noted estimates observed in this sample were slightly lower as compared to rates of clinically  
19 elevated distress reported among the general population in the U.S. during comparable stages of  
20 the pandemic, which have ranged from 20-45%.[20-23] Differences in samples, measurement, or  
21 clinical thresholds among studies may in part help to explain this discrepancy. Additionally, the  
22 generally older age of our sample’s participants may also account for these differences. Studies  
23 examining age differences in mental health symptoms have found older adults are reporting fewer  
24 symptoms of anxiety and depression in response to the COVID-19 pandemic compared to their  
25 younger counterparts,[24] despite their greater COVID-19 risk. Possible age-related protective  
26 factors may be a lower perceived socio-economic impact of the pandemic, as well as older adults’  
27 tendency to display greater resiliency in the face of acute stress due to accumulated experience  
28 navigating other life stressors.  
29  
30  
31  
32  
33  
34  
35  
36  
37  
38  
39  
40  
41  
42  
43  
44  
45  
46  
47  
48

49 This investigation also helps to elucidate possible risk factors contributing increased mental  
50 health risk during the COVID-19 pandemic. Consistent with prior research among the general  
51 population,[25] women reported a higher mental health burden after accounting for additional  
52  
53  
54  
55  
56  
57  
58  
59  
60

1  
2  
3 sociodemographic factors, with a nearly two to threefold increase in risk. This may reflect the  
4  
5 disproportionate challenges women have faced in regard to family caretaking, household  
6  
7 responsibilities, and job loss as a result of the pandemic.[26] Low health activation was also a  
8  
9 predictor of significant anxiety symptoms. In the context of the COVID-19 pandemic,  
10  
11 psychosocial characteristics such as lower confidence in managing physical or mental health, less  
12  
13 ability to engage in problem-solving around new health challenges, and/or greater passivity  
14  
15 communicating personal health needs may have contributed to higher levels of uncertainty or  
16  
17 distress.  
18  
19  
20

21  
22 Interestingly, while all adults in this sample had at least one chronic medical condition,  
23  
24 neither greater medical comorbidity nor poorer self-reported health were associated with  
25  
26 significant anxiety and depressive symptoms after adjusting for other sociodemographic and  
27  
28 health-related factors. It could be that personal health plays a lesser role in mental health  
29  
30 functioning during the pandemic than expected, or that no additional risk to mental health was  
31  
32 conferred by having more than one medical condition. Alternatively, it may also be that our sample  
33  
34 did not consider themselves to be at higher COVID-19 risk due to their health conditions, which  
35  
36 may have served as a protective factor against psychosocial distress. This could have been due to  
37  
38 general perceptions of their health or medical illness, as over three-quarters of our sample self-  
39  
40 reported their health as at least 'good', despite a similar amount reporting the presence of at least  
41  
42 two chronic conditions. However, it may also be that the rapidly changing, and often conflicting,  
43  
44 public health messaging around risk and prevention in the early stages of the pandemic contributed  
45  
46 to confusion around personal susceptibility.[27] Future studies may consider understanding of and  
47  
48 perceptions of personal risk as a possible mediating factor between multimorbidity and a high  
49  
50 mental health burden.  
51  
52  
53  
54  
55  
56  
57  
58  
59  
60

1  
2  
3 As expected, the presence of significant anxiety and depressive symptoms were both  
4 associated with higher rates of COVID-related emotional distress. Specifically, respondents with  
5 clinically-relevant symptoms were much more likely to report they were very worried about  
6 contracting COVID-19, and three to five times as likely to endorse feelings of stress and loneliness  
7 as a result of the pandemic. Worry and stress were particularly high for individuals with anxiety,  
8 while loneliness was elevated in those with depression. These findings support the need for  
9 targeted mental health screening among adults with underlying medical conditions reporting high  
10 levels of isolation or worry and stress related to the pandemic. Conversely, clinicians should be  
11 aware that adults with pre-existing anxiety or depressive disorders may be at increased risk of  
12 COVID-specific emotional distress.  
13  
14  
15  
16  
17  
18  
19  
20  
21  
22  
23  
24  
25

26 Finally, our results indicate that a high mental health burden may also translate to increased  
27 difficulty managing health and maintaining access to routine and emergency medical services  
28 during the pandemic among those with pre-existing medical conditions. Both anxiety and  
29 depression were separately associated with greater self-reported difficulty managing health and  
30 medications, more barriers to medication adherence, as well as greater avoidance of the doctor due  
31 to worry about contracting COVID-19. Those with high levels of anxiety, in particular, also  
32 reported less comfort returning to the doctor once stay-at-home restrictions ended, indicating  
33 concerns about COVID-19 may continue to impact healthcare service use even after restrictions  
34 are lifted and the acute crisis improves. While our sample overall reported less physical activity,  
35 alcohol use remained relatively stable; furthermore, a higher mental health burden was not  
36 associated change in either of these behaviors. Taken together, these findings have particular  
37 relevance to clinicians and public health authorities alike. As vaccine availability remains limited  
38 and hesitancy high,[28] and treatments for early disease are still in development, optimization of  
39  
40  
41  
42  
43  
44  
45  
46  
47  
48  
49  
50  
51  
52  
53  
54  
55  
56  
57  
58  
59  
60

1  
2  
3 health and chronic disease status among those with multimorbidity remains a potentially important  
4  
5 barrier against infection and serious illness. Thus, any psycho-behavioral factors impacting  
6  
7 adequate chronic disease management among this population should be addressed.  
8  
9

10  
11 There are several limitations which should be noted. Foremost, this study was cross-  
12  
13 sectional, which prevents the ability to infer causation. It is not clear whether a high mental health  
14  
15 burden led to higher rate of COVID-related distress and maladaptive health behaviors observed,  
16  
17 or vice versa. As information on mental health functioning prior to the pandemic was not currently  
18  
19 available for the full sample, it is difficult to determine whether any psychological distress and its  
20  
21 associated impact are a result of the pandemic, or merely a continuation or exacerbation of a  
22  
23 previous condition. This assessment was also conducted at the initial stages of the crisis; it is  
24  
25 unclear how these findings may change as the pandemic progresses. Additional analyses with  
26  
27 follow-up survey waves of the C3 cohort will therefore be necessary. Given the sample was also  
28  
29 primarily older, female, and with chronic medical conditions this limits generalizability. However,  
30  
31 the diversity of the sample with regard to race/ethnicity, socioeconomic status, and health literacy  
32  
33 should also be noted.  
34  
35  
36

### 37 38 **Conclusion**

39  
40 Within a sample consisting of primarily older adults with underlying medical conditions,  
41  
42 clinically-relevant symptoms of anxiety and depression were relatively common during the early  
43  
44 stages of the COVID-19 pandemic in the U.S., with women and those with low health activation  
45  
46 disproportionately exhibiting greater risk. Importantly, a high mental health burden may also  
47  
48 interfere with the ability to sufficiently manage health during the pandemic. At a time when it is  
49  
50 of the utmost importance that individuals with underlying conditions adequately self-manage their  
51  
52 health to minimize COVID-19 risk, factors which may interfere with this ability should be  
53  
54  
55  
56  
57  
58  
59

1  
2  
3 addressed, including mental health. As the COVID-19 crisis continues and daily life remains  
4  
5 drastically altered, findings from this study reinforce the need for increased awareness surrounding  
6  
7 the mental health risks associated with the COVID-19 pandemic among individuals with  
8  
9 underlying medical conditions. Health systems and practitioners should respond accordingly  
10  
11 through enhanced screening and provision of mental health resources for individuals at high  
12  
13 COVID-19 risk.  
14  
15  
16  
17  
18  
19  
20  
21  
22  
23  
24  
25  
26  
27  
28  
29  
30  
31  
32  
33  
34  
35  
36  
37  
38  
39  
40  
41  
42  
43  
44  
45  
46  
47  
48  
49  
50  
51  
52  
53  
54  
55  
56  
57  
58  
59  
60

**AUTHOR CONTRIBUTIONS**

RML contributed to manuscript conception, design of the work, data analysis, interpretation of data, as well as drafted the manuscript and revised it following author feedback. LO contributed to manuscript conception, data analysis, interpretation of data, and editing of manuscript drafts. AR, EY, SWL, MS and SCB contributed to manuscript conception, interpretation of data, and editing of manuscript drafts. MSW contributed to manuscript conception, design of the work, interpretation of data, and editing of manuscript drafts. All authors have approved the submitted version.



## REFERENCES

1. Centers for Disease Control and Prevention [Internet]. COVID Data Tracker: United States COVID-19 Cases and Deaths by State. [Date accessed 2021 10 Feb]. Available from: <https://covid.cdc.gov/covid-data-tracker/#datatracker-home>.
2. Nicola M, Alsafi Z, Sohrabi C, et al. The socio-economic implications of the coronavirus pandemic (COVID-19): A review. *Int J Surg* 2020;78:185-93.
3. American Psychological Association [Internet]. Stress in America 2020: A National Mental Health Crisis. [Date accessed 2021 10 Feb]. Available from: <https://www.apa.org/news/press/releases/stress/2020/report-october>
4. Czeisler MÉ, Lane RI, Petrosky E, et al. Mental health, substance use, and suicidal ideation during the COVID-19 pandemic - United States, June 24-30, 2020. *MMWR: Morbidity & Mortality Weekly Report* 2020;69(32):1049-57.
5. Centers for Disease Control and Prevention [Internet]. COVID-19: Your Health: People with Certain Medical Conditions. [Date accessed 2021 10 Feb]. Available from: [https://www.cdc.gov/coronavirus/2019-ncov/need-extra-precautions/people-with-medical-conditions.html?CDC\\_AA\\_refVal=https%3A%2F%2Fwww.cdc.gov%2Fcoronavirus%2F2019-ncov%2Fneed-extra-precautions%2Fgroups-at-higher-risk.html](https://www.cdc.gov/coronavirus/2019-ncov/need-extra-precautions/people-with-medical-conditions.html?CDC_AA_refVal=https%3A%2F%2Fwww.cdc.gov%2Fcoronavirus%2F2019-ncov%2Fneed-extra-precautions%2Fgroups-at-higher-risk.html)
6. Wong SYS, Zhang D, Sit RWS, et al. Impact of COVID-19 on loneliness, mental health, and health service utilisation: a prospective cohort study of older adults with multimorbidity in primary care. *Br J Gen Pract* 2020;70(700):e817-e24.

7. Wolf MS, Serper M, Opsasnick L, et al. Awareness, attitudes, and actions related to COVID-19 among adults with chronic conditions at the onset of the U.S. outbreak: A cross-sectional survey. *Ann Intern Med* 2020;173(2):100-9.
8. O'Connor R, Arvanitis M, Wismer G, et al. Rationale and design of the regimen education and messaging in diabetes (REMinD) trial. *Contemp Clin Trials* 2019;83:46-52.
9. Wolf MS, Curtis LM, Wilson EA, et al. Literacy, cognitive function, and health: results of the LitCog study. *J Gen Intern Med*. 2012;27(10):1300-7.
10. Bailey SC, Wismer GA, Parker RM, et al. Development and rationale for a multifactorial, randomized controlled trial to test strategies to promote adherence to complex drug regimens among older adults. *Contemp Clin Trials* 2017;62:21-6.
11. Weiss BD, Mays MZ, Martz W, et al. Quick assessment of literacy in primary care: the newest vital sign. *Ann Fam Med* 2005;3(6):514-22.
12. Wolf MS, Smith SG, Pandit AU, et al. Development and validation of the consumer health activation index. *Med Decis Making* 2018;38(3):334-43.
13. Smith SG, Curtis LM, Wardle J, et al. Skill set or mind set? Associations between health literacy, patient activation and health. *PloS One* 2013;8(9):e74373.
14. Cella D, Riley W, Stone A, et al. The Patient-Reported Outcomes Measurement Information System (PROMIS) developed and tested its first wave of adult self-reported health outcome item banks: 2005-2008. *J Clin Epidemiol* 2010;63(11):1179-94.
15. Choi SW, Schalet B, Cook KF, et al. Establishing a common metric for depressive symptoms: linking the BDI-II, CES-D, and PHQ-9 to PROMIS depression. *Psychol Assess* 2014;26(2):513-27.

16. Schalet BD, Cook KF, Choi SW, et al. Establishing a common metric for self-reported anxiety: linking the MASQ, PANAS, and GAD-7 to PROMIS Anxiety. *J Anxiety Disord* 2014;28(1):88-96.
17. Schalet BD, Pilkonis PA, Yu L, et al. Clinical validity of PROMIS Depression, Anxiety, Anger across diverse clinical samples. *J Clin Epidemiol* 2006;73:119-27.
18. Matza LS, Park J, Coyne KS, et al. Derivation and validation of the ASK-12 adherence barrier survey. *Ann Pharmacother* 2009;43(10):1621-30.
19. Zou G. A modified poisson regression approach to prospective studies with binary data. *Am J Epidemiol* 2004;159(7):702-6.
20. Centers for Disease Control and Prevention [Internet]. National Center for Health Statistics. Mental Health: Household Pulse Survey. [Date accessed 10 Feb 2021]. Available from: <https://www.cdc.gov/nchs/covid19/pulse/mental-health.htm>.
21. Bryan CJ, Bryan AO, Baker JC. Associations among state-level physical distancing measures and suicidal thoughts and behaviors among U.S. adults during the early COVID-19 pandemic. *Suicide Life-Threat Behav* 2020. [Epub ahead of print].
22. Liu CH, Zhang E, Wong GTF, et al. Factors associated with depression, anxiety, and PTSD symptomatology during the COVID-19 pandemic: Clinical implications for U.S. young adult mental health. *Psychiatry Res* 2020;290:113172.
23. Fitzpatrick KM, Harris C, Drawve G. Fear of COVID-19 and the mental health consequences in America. *Psycholog Trauma* 2020. [Epub ahead of print].
24. Bruine de Bruin W. Age differences in COVID-19 risk perceptions and mental health: Evidence from a national US survey conducted in March 2020. *J Gerontol B Psychol Sci Soc Sci* 2020. [Epub ahead of print].

- 1  
2  
3  
4  
5  
6  
7  
8  
9  
10  
11  
12  
13  
14  
15  
16  
17  
18  
19  
20  
21  
22  
23  
24  
25  
26  
27  
28  
29  
30  
31  
32  
33  
34  
35  
36  
37  
38  
39  
40  
41  
42  
43  
44  
45  
46  
47  
48  
49  
50  
51  
52  
53  
54  
55  
56  
57  
58  
59  
60
25. Pierce M, Hope H, Ford T, et al. Mental health before and during the COVID-19 pandemic: a longitudinal probability sample survey of the UK population. *Lancet Psychiatry* 2020. [Epub ahead of print].
26. Adams-Prassl AB, Golin, M, Rauh, C. Inequality in the impact of the coronavirus shock: Evidence from real time surveys. Cambridge Working Papers in Economics: 2032. 2020;Cambridge-INET Working Paper Series No: 2020/18.
27. American Public Health Association [Internet]. Countering the “infodemic” of misinformation. [Date accessed 10 Feb 2021]. Available from: <https://www.apha.org/covid19>.
28. Khubchandani J, Sharma S, Price JH, et al. COVID-19 Vaccination Hesitancy in the United States: A Rapid National Assessment. *J Community Health* 2021:1-8.

**STROBE 2007 (v4) checklist of items to be included in reports of observational studies in epidemiology\***  
**Checklist for cohort, case-control, and cross-sectional studies (combined)**

| Section/Topic             | Item # | Recommendation                                                                                                                                                                                                                                                                                                                                                                                                                                                         | Reported on page #       |
|---------------------------|--------|------------------------------------------------------------------------------------------------------------------------------------------------------------------------------------------------------------------------------------------------------------------------------------------------------------------------------------------------------------------------------------------------------------------------------------------------------------------------|--------------------------|
| Title and abstract        | 1      | (a) Indicate the study’s design with a commonly used term in the title or the abstract                                                                                                                                                                                                                                                                                                                                                                                 | 1                        |
|                           |        | (b) Provide in the abstract an informative and balanced summary of what was done and what was found                                                                                                                                                                                                                                                                                                                                                                    | 2-3                      |
| <b>Introduction</b>       |        |                                                                                                                                                                                                                                                                                                                                                                                                                                                                        |                          |
| Background/rationale      | 2      | Explain the scientific background and rationale for the investigation being reported                                                                                                                                                                                                                                                                                                                                                                                   | 6-7                      |
| Objectives                | 3      | State specific objectives, including any pre-specified hypotheses                                                                                                                                                                                                                                                                                                                                                                                                      | 7                        |
| <b>Methods</b>            |        |                                                                                                                                                                                                                                                                                                                                                                                                                                                                        |                          |
| Study design              | 4      | Present key elements of study design early in the paper                                                                                                                                                                                                                                                                                                                                                                                                                | 7-8                      |
| Setting                   | 5      | Describe the setting, locations, and relevant dates, including periods of recruitment, exposure, follow-up, and data collection                                                                                                                                                                                                                                                                                                                                        | 7-8                      |
| Participants              | 6      | (a) <i>Cohort study</i> —Give the eligibility criteria, and the sources and methods of selection of participants. Describe methods of follow-up<br><i>Case-control study</i> —Give the eligibility criteria, and the sources and methods of case ascertainment and control selection. Give the rationale for the choice of cases and controls<br><i>Cross-sectional study</i> —Give the eligibility criteria, and the sources and methods of selection of participants | 7-8                      |
|                           |        | (b) <i>Cohort study</i> —For matched studies, give matching criteria and number of exposed and unexposed<br><i>Case-control study</i> —For matched studies, give matching criteria and the number of controls per case                                                                                                                                                                                                                                                 | N/A                      |
| Variables                 | 7      | Clearly define all outcomes, exposures, predictors, potential confounders, and effect modifiers. Give diagnostic criteria, if applicable                                                                                                                                                                                                                                                                                                                               | 8-10                     |
| Data sources/ measurement | 8*     | For each variable of interest, give sources of data and details of methods of assessment (measurement). Describe comparability of assessment methods if there is more than one group                                                                                                                                                                                                                                                                                   | 8-10                     |
| Bias                      | 9      | Describe any efforts to address potential sources of bias                                                                                                                                                                                                                                                                                                                                                                                                              |                          |
| Study size                | 10     | Explain how the study size was arrived at                                                                                                                                                                                                                                                                                                                                                                                                                              | N/A – secondary analysis |
| Quantitative variables    | 11     | Explain how quantitative variables were handled in the analyses. If applicable, describe which groupings were chosen and why                                                                                                                                                                                                                                                                                                                                           | 8-11                     |
| Statistical methods       | 12     | (a) Describe all statistical methods, including those used to control for confounding                                                                                                                                                                                                                                                                                                                                                                                  | 10-11                    |
|                           |        | (b) Describe any methods used to examine subgroups and interactions                                                                                                                                                                                                                                                                                                                                                                                                    | N/A                      |
|                           |        | (c) Explain how missing data were addressed                                                                                                                                                                                                                                                                                                                                                                                                                            | 11                       |
|                           |        | (d) <i>Cohort study</i> —If applicable, explain how loss to follow-up was addressed                                                                                                                                                                                                                                                                                                                                                                                    | N/A                      |

|                          |     |                                                                                                                                                                                                              |       |
|--------------------------|-----|--------------------------------------------------------------------------------------------------------------------------------------------------------------------------------------------------------------|-------|
|                          |     | <i>Case-control study</i> —If applicable, explain how matching of cases and controls was addressed                                                                                                           |       |
|                          |     | <i>Cross-sectional study</i> —If applicable, describe analytical methods taking account of sampling strategy                                                                                                 |       |
|                          |     | (e) Describe any sensitivity analyses                                                                                                                                                                        | N/A   |
| <b>Results</b>           |     |                                                                                                                                                                                                              |       |
| Participants             | 13* | (a) Report numbers of individuals at each stage of study—eg numbers potentially eligible, examined for eligibility, confirmed eligible, included in the study, completing follow-up, and analysed            | 11    |
|                          |     | (b) Give reasons for non-participation at each stage                                                                                                                                                         | 11    |
|                          |     | (c) Consider use of a flow diagram                                                                                                                                                                           | N/A   |
| Descriptive data         | 14* | (a) Give characteristics of study participants (eg demographic, clinical, social) and information on exposures and potential confounders                                                                     | 11-12 |
|                          |     | (b) Indicate number of participants with missing data for each variable of interest                                                                                                                          |       |
|                          |     | (c) <i>Cohort study</i> —Summarise follow-up time (eg, average and total amount)                                                                                                                             | N/A   |
| Outcome data             | 15* | <i>Cohort study</i> —Report numbers of outcome events or summary measures over time                                                                                                                          | N/A   |
|                          |     | <i>Case-control study</i> —Report numbers in each exposure category, or summary measures of exposure                                                                                                         | N/A   |
|                          |     | <i>Cross-sectional study</i> —Report numbers of outcome events or summary measures                                                                                                                           | 12-15 |
| Main results             | 16  | (a) Give unadjusted estimates and, if applicable, confounder-adjusted estimates and their precision (eg, 95% confidence interval). Make clear which confounders were adjusted for and why they were included | 12-15 |
|                          |     | (b) Report category boundaries when continuous variables were categorized                                                                                                                                    |       |
|                          |     | (c) If relevant, consider translating estimates of relative risk into absolute risk for a meaningful time period                                                                                             | N/A   |
| Other analyses           | 17  | Report other analyses done—eg analyses of subgroups and interactions, and sensitivity analyses                                                                                                               | N/A   |
| <b>Discussion</b>        |     |                                                                                                                                                                                                              |       |
| Key results              | 18  | Summarise key results with reference to study objectives                                                                                                                                                     | 15-19 |
| Limitations              | 19  | Discuss limitations of the study, taking into account sources of potential bias or imprecision. Discuss both direction and magnitude of any potential bias                                                   | 18-19 |
| Interpretation           | 20  | Give a cautious overall interpretation of results considering objectives, limitations, multiplicity of analyses, results from similar studies, and other relevant evidence                                   | 15-19 |
| Generalisability         | 21  | Discuss the generalisability (external validity) of the study results                                                                                                                                        | 19    |
| <b>Other information</b> |     |                                                                                                                                                                                                              |       |
| Funding                  | 22  | Give the source of funding and the role of the funders for the present study and, if applicable, for the original study on which the present article is based                                                | 4     |

\*Give information separately for cases and controls in case-control studies and, if applicable, for exposed and unexposed groups in cohort and cross-sectional studies.

1  
2  
3  
4  
5  
6  
7  
8  
9  
10  
11  
12  
13  
14  
15  
16  
17  
18  
19  
20  
21  
22  
23  
24  
25  
26  
27  
28  
29  
30  
31  
32  
33  
34  
35  
36  
37  
38  
39  
40  
41  
42  
43  
44  
45  
46

**Note:** An Explanation and Elaboration article discusses each checklist item and gives methodological background and published examples of transparent reporting. The STROBE checklist is best used in conjunction with this article (freely available on the Web sites of PLoS Medicine at <http://www.plosmedicine.org/>, Annals of Internal Medicine at <http://www.annals.org/>, and Epidemiology at <http://www.epidem.com/>). Information on the STROBE Initiative is available at [www.strobe-statement.org](http://www.strobe-statement.org).

For peer review only

# BMJ Open

## Prevalence of anxiety and depressive symptoms and impact on self-management among adults with chronic conditions in Chicago, IL, USA during the COVID-19 pandemic: a cross-sectional survey

|                                 |                                                                                                                                                                                                                                                                                                                                                                                                                                                                                                                                                                                                                                                                                                                                                                                                                                        |
|---------------------------------|----------------------------------------------------------------------------------------------------------------------------------------------------------------------------------------------------------------------------------------------------------------------------------------------------------------------------------------------------------------------------------------------------------------------------------------------------------------------------------------------------------------------------------------------------------------------------------------------------------------------------------------------------------------------------------------------------------------------------------------------------------------------------------------------------------------------------------------|
| Journal:                        | <i>BMJ Open</i>                                                                                                                                                                                                                                                                                                                                                                                                                                                                                                                                                                                                                                                                                                                                                                                                                        |
| Manuscript ID                   | bmjopen-2021-052495.R1                                                                                                                                                                                                                                                                                                                                                                                                                                                                                                                                                                                                                                                                                                                                                                                                                 |
| Article Type:                   | Original research                                                                                                                                                                                                                                                                                                                                                                                                                                                                                                                                                                                                                                                                                                                                                                                                                      |
| Date Submitted by the Author:   | 08-Oct-2021                                                                                                                                                                                                                                                                                                                                                                                                                                                                                                                                                                                                                                                                                                                                                                                                                            |
| Complete List of Authors:       | Lovett, Rebecca; Northwestern University Feinberg School of Medicine, Department of General Internal Medicine & Geriatrics<br>Opsasnick, Lauren; Northwestern University Feinberg School of Medicine<br>Russell, Andrea; Northwestern University Feinberg School of Medicine, Department of General Internal Medicine & Geriatrics<br>Yoon, Esther; Northwestern University Feinberg School of Medicine, Department of General Internal Medicine & Geriatrics<br>Weiner-Light, Sophia; Northwestern University Feinberg School of Medicine, Department of General Internal Medicine & Geriatrics<br>Serper, Marina; University of Pennsylvania Perelman School of Medicine, Department of Medicine<br>Cooper Bailey, Stacy; Northwestern University<br>Wolf, Michael; Northwestern University, Department of General Internal Medicine |
| <b>Primary Subject Heading</b>: | Infectious diseases                                                                                                                                                                                                                                                                                                                                                                                                                                                                                                                                                                                                                                                                                                                                                                                                                    |
| Secondary Subject Heading:      | Mental health                                                                                                                                                                                                                                                                                                                                                                                                                                                                                                                                                                                                                                                                                                                                                                                                                          |
| Keywords:                       | COVID-19, MENTAL HEALTH, PRIMARY CARE                                                                                                                                                                                                                                                                                                                                                                                                                                                                                                                                                                                                                                                                                                                                                                                                  |
|                                 |                                                                                                                                                                                                                                                                                                                                                                                                                                                                                                                                                                                                                                                                                                                                                                                                                                        |

SCHOLARONE™  
Manuscripts





I, the Submitting Author has the right to grant and does grant on behalf of all authors of the Work (as defined in the below author licence), an exclusive licence and/or a non-exclusive licence for contributions from authors who are: i) UK Crown employees; ii) where BMJ has agreed a CC-BY licence shall apply, and/or iii) in accordance with the terms applicable for US Federal Government officers or employees acting as part of their official duties; on a worldwide, perpetual, irrevocable, royalty-free basis to BMJ Publishing Group Ltd ("BMJ") its licensees and where the relevant Journal is co-owned by BMJ to the co-owners of the Journal, to publish the Work in this journal and any other BMJ products and to exploit all rights, as set out in our [licence](#).

The Submitting Author accepts and understands that any supply made under these terms is made by BMJ to the Submitting Author unless you are acting as an employee on behalf of your employer or a postgraduate student of an affiliated institution which is paying any applicable article publishing charge ("APC") for Open Access articles. Where the Submitting Author wishes to make the Work available on an Open Access basis (and intends to pay the relevant APC), the terms of reuse of such Open Access shall be governed by a Creative Commons licence – details of these licences and which [Creative Commons](#) licence will apply to this Work are set out in our licence referred to above.

Other than as permitted in any relevant BMJ Author's Self Archiving Policies, I confirm this Work has not been accepted for publication elsewhere, is not being considered for publication elsewhere and does not duplicate material already published. I confirm all authors consent to publication of this Work and authorise the granting of this licence.

**Prevalence of anxiety and depressive symptoms and impact on self-management among adults with chronic conditions in Chicago, IL, USA during the COVID-19 pandemic: a cross-sectional survey**

Rebecca M. Lovett<sup>1</sup>; Lauren Opsasnick<sup>1</sup>; Andrea Russell<sup>1</sup>; Esther Yoon<sup>1</sup>; Sophia Weiner-Light<sup>1</sup>; Marina Serper<sup>2</sup>; Stacy Cooper Bailey<sup>1</sup>; Michael S. Wolf<sup>1</sup>

<sup>1</sup>Department of General Internal Medicine & Geriatrics, Northwestern University Feinberg School of Medicine, Chicago, IL USA

<sup>2</sup>Division of Gastroenterology and Hepatology, Department of Medicine, University of Pennsylvania Perelman School of Medicine, Philadelphia, PA USA

Corresponding Author Information:

Rebecca M. Lovett, PhD  
Division of General Internal Medicine & Geriatrics  
Northwestern University Feinberg School of Medicine  
750 North Lakeshore Drive, 10<sup>th</sup> Floor  
Chicago, IL 60611  
Phone: +1 (312) 503-3276  
Email: r-lovett@northwestern.edu

Abstract Word Count: 277/300

Manuscript Word Count: 3634/4000

Number of Tables: 4

Number of References: 28

Keywords: COVID-19, mental health, depression, anxiety, health self-management, healthcare utilization

**ABSTRACT**

**Objectives:** To examine the prevalence of mental health symptoms during the first surge of COVID-19 in the U.S, and their associations with COVID-related emotional distress, health self-management, and healthcare utilization.

**Design:** Cross-sectional analysis of Wave 3 (May 1 – 22, 2020) survey data from the ongoing Chicago COVID-19 and Comorbidities (C3) study.

**Setting:** Seven academic and community health centers in Chicago, IL.

**Participants:** 565 adults aged 23 to 88 with one or more chronic conditions completing at least one prior C3 study Wave.

**Primary and secondary outcome measures:** Clinically-relevant anxiety and depressive symptoms as measured using Patient-Reported Outcomes Measurement Information System (PROMIS) short-forms. Self-reported emotional and health-related responses to COVID-19 were measured through a combination of single-item questions and validated measures.

**Results:** Rates of anxiety and depressive symptoms were 14% (81/563) and 15% (84/563), respectively. Anxiety and depressive symptoms were then each separately associated with greater worry about contracting COVID-19 (RR 2.32, 95% CI 1.52 – 3.53; RR 1.67, 95% CI 1.10 – 2.54), greater stress (RR 4.93, 95% CI 3.20 – 7.59; RR 3.01, 1.96 – 4.61) and loneliness (RR 3.82, 95% CI 2.21 – 6.60; RR 5.37, 95% CI 3.21 – 8.98), greater avoidance of the doctor (RR 1.62, 95% CI 1.06 – 2.49; RR 1.54, 95% CI 1.00 – 2.36), and difficulty managing health (LS Means 6.09, 95% CI 5.25 – 6.92 vs. 4.23, 95% CI 3.70 – 4.75; LS Means 5.85, 95% CI 5.04 – 6.65 vs. 4.22, 95% CI 3.84 – 4.70) and medications (LS Means 3.71, 95% CI 2.98 – 4.43 vs. 2.47, 95% CI 2.02 – 2.92) due to the pandemic.

1  
2  
3 **Conclusions:** Identifying and addressing mental health concerns may be an important factor to  
4  
5 consider in COVID-19 prevention and management among high-risk medical populations.  
6  
7  
8  
9  
10  
11  
12  
13  
14  
15  
16  
17  
18  
19  
20  
21  
22  
23  
24  
25  
26  
27  
28  
29  
30  
31  
32  
33  
34  
35  
36  
37  
38  
39  
40  
41  
42  
43  
44  
45  
46  
47  
48  
49  
50  
51  
52  
53  
54  
55  
56  
57  
58  
59  
60

For peer review only

## ARTICLE SUMMARY

### Strengths and Limitations of this Study

- A major strength of this study was the intentional focus on adults with one or more chronic medical conditions, a population at higher risk for adverse COVID-19 outcomes.
- Our sample was diverse by race/ethnicity, SES, and health literacy, increasing generalizability.
- Mental health symptoms were based on self-report, not diagnostic assessment.
- The cross-sectional nature of the analysis and lack of information on mental health functioning prior to the COVID-19 pandemic limits the ability to infer causation.

### Funding

This work was supported by grants R01AG030611, R01AG046352, R01DK110172, R01NR015444, and P30AG059988 from the National Institutes of Health (NIH). The funding organization had no role in the design of the study and collection, analysis, and interpretation of data, and in writing the manuscript.

### Competing Interests

MS reports personal fees from BioVie outside the submitted work. SCB reports grants from the NIH during the conduct of the study; grants from Merck, the NIH, the Gordon and Betty Moore Foundation, and Eli Lilly outside the submitted work; grants and personal fees from Pfizer outside the submitted work; and personal fees from Sanofi, University of Westminster, and Luto outside the submitted work. MSW reports grants from the NIH during the conduct of the study; grants from Merck, the Gordon and Betty Moore Foundation, the NIH, and Eli Lilly outside the submitted work; and personal fees from Sanofi, Pfizer, and Luto outside the submitted work. Authors not named here have disclosed no conflicts of interest.

**Data Sharing**

Data available upon reasonable request to the corresponding author.

For peer review only

## INTRODUCTION

The rapid emergence and ongoing spread of the SARS-CoV-2 virus underlying the COVID-19 respiratory disease has resulted in an unprecedented disruption to the health and daily lives of Americans and poses a significant challenge to mental health. Since the U.S. onset of the pandemic in March 2020, confirmed cases of COVID-19 have dramatically increased,[1] fueling fear of contagion and concerns for healthcare shortages. Social distancing and shelter-in-place (SIP) restrictions, while vital to mitigate the virus' spread, have also resulted in significant economic and social challenges,[2] such as loss of livelihoods and family/community connectedness, which may also inadvertently increase emotional distress. Results from several population-based surveys have indicated Americans overall are reporting higher rates of loneliness and stress,[3] as well as symptoms of depression and anxiety since the pandemic first began.[4]

However, comparatively little research has focused on how the COVID-19 pandemic has affected the mental health of adults with chronic medical conditions, who are considered to be at an elevated risk for severe illness should they contract the virus, and for whom public health authorities have recommended especially close adherence to COVID-19 safety precautions.[5] Early evidence has found support for declines in mental health and well-being among this group.[6] However, factors contributing to mental health risk, as well the significance of these changes, including impact on daily function, are unclear. In particular, it is necessary to better understand the degree to which significantly elevated anxiety and depressive symptoms may interfere with management of health and utilization of healthcare services during the COVID-19 pandemic, for instance through adequate adherence to drug regimens, engagement in recommended health behaviors, and maintaining access to healthcare. Such investigations are of particular importance

1  
2  
3 in this population, for whom the ability to continue to successfully self-manage pre-existing health  
4 concerns during the pandemic may help serve to decrease COVID-19 risk.[5]  
5  
6

7  
8 The objective of the present study was thus two-fold. First, we sought to determine the  
9 prevalence of clinically-relevant depressive and anxiety symptoms during the early stages of the  
10 2020 U.S. COVID-19 outbreak, within a population at increased COVID-19 risk due to medical  
11 comorbidity. Second, we examined associations between anxiety and depressive symptoms with  
12 rates of worry, stress, and loneliness related to the pandemic, in addition to health self-management  
13 and utilization of healthcare services. Findings from this investigation may inform the need for  
14 targeted mental health screening and intervention efforts related to the COVID-19 pandemic  
15 among vulnerable populations, or offer insight on the mental health effects of future public health  
16 emergencies should they arise.  
17  
18  
19  
20  
21  
22  
23  
24  
25  
26  
27

## 28 **METHODS**

29  
30  
31 The Chicago COVID-19 Comorbidities (C3) Study is an ongoing longitudinal, telephone-  
32 based survey examining attitudes and behaviors related to the COVID-19 pandemic. An in-depth  
33 explanation of the methods and details of the study have been published elsewhere.[7] However,  
34 in brief, participants were originally recruited from one of four current National Institute of Health-  
35 sponsored research projects across Chicago, Illinois, USA (R01AG030611; R01NR015444;  
36 R01AG046352; R01DK110172).[8-10] Objectives and methods of the parent studies varied,  
37 however, studies were selected for the C3 Study if they enrolled mostly middle-aged or older adults  
38 with at least one chronic condition. The goal was to create a cohort of participants considered to  
39 be at higher risk for an adverse outcome should they contract COVID-19. As part of their parent  
40 study participation, all participants recruited for the C3 study had given prior consent to be  
41 contacted for future research opportunities. To ensure any data obtained from the parent study was  
42  
43  
44  
45  
46  
47  
48  
49  
50  
51  
52  
53  
54  
55  
56  
57  
58  
59  
60



1  
2  
3 current, only participants who had completed their most recent parent study interview in 2018 or  
4  
5 later were eligible for inclusion in the C3 survey.  
6

7  
8 To date, data collection has occurred over three waves approximately one month apart,  
9  
10 beginning in the middle of March at the U.S. outset of the COVID-19 outbreak. Data for this  
11  
12 analysis was collected during Wave 3 (May 1 – 22, 2020), as standardized measures of  
13  
14 psychological functioning were introduced into the study battery at this timepoint.  
15

### 16 **Ethics Approval**

17  
18 The C3 protocol was reviewed and approved by the Northwestern University Institutional  
19  
20 Review Board (IRB) prior to each study wave as a modification for each individual parent study  
21  
22 (Wave 3 IRB Approval numbers: STU00026255-MOD0062, STU00204465-MOD0034,  
23  
24 STU00203777-MOD0032, STU00201639-MOD0039). The cohort remains active with  
25  
26 additional planned survey waves.  
27  
28  
29

### 30 **Sample**

31  
32 Specific eligibility criteria for the parent studies varied, however all participants were  
33  
34 eligible for the C3 survey if they had 1) reported at least one chronic medical condition during  
35  
36 their parent study interview, 2) completed their parent study in 2018 or later, and 3) given previous  
37  
38 consent to be contacted for future research opportunities during their parent study involvement, as  
39  
40 detailed above. Table 1 includes more detailed information about each parent study, including  
41  
42 sample characteristics and specific inclusion/exclusion criteria. Three studies – EHR-based  
43  
44 Universal Medication Schedule to Improve Adherence to Complex Regimens (R01NR01544); A  
45  
46 Universal Medication Schedule to Promote Adherence to Complex Drug Regimens  
47  
48 (R01AG046352); Transplant Regimen Adherence for Kidney Recipients by Engaging Information  
49  
50 Technologies: The TAKE IT Trial (R01DK110172) - are randomized clinical trials evaluating  
51  
52  
53  
54  
55  
56  
57  
58  
59

## MENTAL HEALTH &amp; COVID-19 IN HIGH RISK ADULTS

9

technology-based health systems strategies to enhance patient adherence and safe use of complex drug regimens.[8,10] The Health Literacy and Cognitive Function Among Older Adults (R01AG030611) cohort study examines cognitive and psychosocial factors impacting chronic disease self-management and health outcomes over time.[9]

*Table 1. Sample Characteristics of Parent Studies Involved in the C3 Survey*

| Parent Study<br>(NIH Project<br>Number)                                                                          | Design         | Sample Characteristics           |                    |                                                                                                                                           |                                                                                                      |                                              |
|------------------------------------------------------------------------------------------------------------------|----------------|----------------------------------|--------------------|-------------------------------------------------------------------------------------------------------------------------------------------|------------------------------------------------------------------------------------------------------|----------------------------------------------|
|                                                                                                                  |                | Wave 3 C3 Sample<br>(n = 565), n | Language           | Clinical Inclusion<br>Criteria                                                                                                            | Clinical Exclusion<br>Criteria                                                                       | Setting                                      |
| Health Literacy and Cognitive Function Among Older Adults (R01AG030611)                                          | Cohort         | 137                              | English            | 1) Aged 55-75 at study onset                                                                                                              | 1) Severe, uncorrectable vision, hearing, or cognitive impairments<br>2) Limited English proficiency | 1 academic internal medicine clinic, 5 FQHCs |
| A Universal Medication Schedule to Promote Adherence to Complex Drug Regimens (R01AG046352)                      | Clinical Trial | 197                              | English or Spanish | 1) Aged $\geq 50$ at study onset<br>2) Taking $\geq 5$ long-term Rx medications                                                           | 1) Severe, uncorrectable vision, hearing, or cognitive impairments                                   | 1 academic internal medicine clinic, 1 FQHC  |
| Transplant Adherence for Kidney Recipients by Engaging Information Technologies: The TAKE IT Trial (R01DK110172) | Clinical Trial | 111                              | English            | 1) Aged $\geq 21$ at study onset<br>2) 5 weeks to 24 months post-kidney transplant<br>3) taking $\geq 3$ long-term Rx med                 | 1) Severe, uncorrectable vision, hearing, or cognitive impairments<br>2) Limited English proficiency | 1 academic transplant center                 |
| EHR-Based Universal Medication Schedule to Improve Adherence to Complex Regimens (R01NR015444)                   | Clinical Trial | 120                              | English            | 1) Aged $\geq 21$ at study onset<br>2) T2DM<br>3) Hemoglobin A1C value $\geq 7.5\%$ at study onset<br>4) taking $\geq 5$ long-term Rx med | 1) Severe, uncorrectable vision, hearing, or cognitive impairments<br>2) Limited English proficiency | 5 academic internal medicine clinics         |

C3 = Chicago COVID-19 Comorbidities; COVID-19 = coronavirus disease 2019; EHR = electronic health record; FQHC = federally qualified health center; NIH = National Institutes of Health; Rx = prescription; T2DM = type 2 diabetes mellitus.

Two studies specifically recruited adults with a type-2 diabetes diagnosis or recent kidney transplant.[8] The remaining two studies did not target participants by a specific medical condition, however their inclusion criteria included populations with high likelihood of having a chronic condition, i.e. middle aged to older adults or those with complex drug regimens.[9,10] Other common conditions reported among study participants include hypertension, hypercholesteremia,

1  
2  
3 heart disease, stroke, cancer, and chronic lung disease.[8-10] Participants were not explicitly  
4  
5 excluded from any parent study on the basis of having a certain chronic condition, except if that  
6  
7 condition were to be characterized by an uncorrectable visual, hearing, or cognitive impairment  
8  
9 interfering with study participation (e.g., dementia).  
10

## 11 12 **Procedure**

13  
14  
15 Prior to each study wave, trained research interviewers contacted eligible participants by  
16  
17 telephone to invite them to participate in the C3 survey. Interested participants were given the  
18  
19 option to complete the survey at this initial contact, or to schedule an interview for a later date. All  
20  
21 participants provided verbal consent to participate in the survey at the start of the interview and  
22  
23 prior to any data collection activities. All survey responses were recorded using REDCap software.  
24  
25 The survey took approximately 30-40 minutes to complete, and adults were then mailed a \$15 gift  
26  
27 card for their involvement.  
28  
29

## 30 31 **Measurement**

32  
33 Demographic characteristics (age, sex, race/ethnicity), socioeconomic status (income,  
34  
35 employment, educational attainment), married status, and insurance type were determined from  
36  
37 participants' most recent parent study interview. As part of their parent study involvement, number  
38  
39 of chronic medical conditions were assessed via self-report and medical chart review. For the  
40  
41 purpose of this analysis, responses were summed due to the variability between studies in how this  
42  
43 information was collected. Health literacy and health activation were also measured at their last  
44  
45 parent study visit and assessed using the Newest Vital Sign (NVS)[11] and Consumer Health  
46  
47 Activation Index (CHAI),[12] respectively. Previous research has demonstrated associations  
48  
49 between these factors and measures of physical and mental health.[13] A single question was also  
50  
51  
52  
53  
54  
55  
56  
57  
58  
59  
60

used across studies to gauge self-reported health (excellent, very good, good, fair, poor), which was also collected at participants' last parent study interview date.

### ***Clinically-Relevant Anxiety and Depressive Symptoms***

Current psychological functioning was assessed using the validated Patient-Reported Outcomes Measurement Information System (PROMIS) four-item short-form questionnaires for anxiety and depression.[14] Raw scores are transformed into T-scores, which have a mean of 50 (Standard Deviation (SD) 10), and are normed against the general U.S. population. They have good agreement with legacy measures of mental health functioning such as the GAD-7 and PHQ-9,[15, 16] and have been used to assess mental health among various medical populations.[17] Higher scores represent greater symptom burden. Thresholds previously proposed in the literature and corresponding to symptom levels with clinical significance (i.e. moderate or greater symptom severities indicating probable anxiety or depression) were utilized.[15, 16] This translated to a T-score equal to or greater than 63.2 and 59.9 for clinically-relevant anxiety and depressive symptoms, respectively.

### ***COVID-Related Emotional Distress***

Emotional distress due to the pandemic was assessed using single-item questions asking about worry about contracting COVID-19 (not at all worried, a little worried, somewhat worried, very worried), as well as how often participants felt stressed or lonely due to COVID-19 in the past week (never, some of the time, most of the time, all of the time).

### ***Self-Management of Health***

Two single-item questions were used to assess perceived difficulty managing health and accessing and remembering to take medications during the COVID-19 pandemic (1-10 scale, of increasing difficulty). Barriers to general medication adherence was measured using the 12-item

1  
2  
3 Adherence Starts with Knowledge (ASK-12) survey (range 12-60, higher scores represent more  
4 barriers).[18] Change in physical activity and alcohol use over the past month compared to typical  
5 levels were each assessed with a single item (more than typical, less than typical, the same).  
6  
7  
8

### 9 10 ***Healthcare Utilization***

11  
12 Healthcare utilization was measured through two single-item questions (yes/no) asking  
13 whether participants had missed or cancelled any medical appointments, or avoided the emergency  
14 department or urgent care due to worry about contracting COVID-19. Comfort visiting the doctor  
15 once SIP restrictions ended was also assessed (very comfortable, somewhat comfortable, not that  
16 comfortable, not comfortable at all).  
17  
18  
19  
20  
21  
22

### 23 24 **Statistical Analysis**

25  
26 Descriptive statistics (mean, SD, frequency (%)) were conducted for all participant  
27 characteristics, overall and by the presence or absence (yes/no) of clinically-relevant depressive  
28 and anxiety symptoms. Cross-sectional associations between participant characteristics and  
29 anxiety and depression symptoms were first analyzed using chi-square and independent samples  
30 t-tests, as appropriate, then modeled using multivariate logistic regressions, adjusting for any  
31 characteristics that were significant in bivariate analyses. This process was then repeated, but  
32 instead examining associations between anxiety and depression with each of our outcomes of  
33 interest. Covariate selection for multivariate models at this stage was based on the literature as  
34 well as prior investigations using this cohort,[7] and included age, sex, race/ethnicity, income,  
35 health literacy, health activation, self-reported health, and date of interview. Additionally, all  
36 multivariate models were adjusted for parent study, to control for any between-subject correlation  
37 within a specific study. For all multivariate models, anxiety and depression were examined as  
38 separate exposure variables; least squared means (LS Means) were obtained for continuous  
39  
40  
41  
42  
43  
44  
45  
46  
47  
48  
49  
50  
51  
52  
53  
54  
55  
56  
57  
58  
59  
60

1  
2  
3 outcomes using a generalized linear model (GLM), whereas for categorical outcomes a  
4  
5 multivariate Poisson distribution was used to estimate relative risk (RR) estimates in lieu of odds  
6  
7 ratios for ease of interpretation.[19] Pairwise deletion was used, and associations were determined  
8  
9 to be statistically significant if they had a  $p$  value of  $< 0.05$ . Descriptive and bivariate analyses  
10  
11 were performed using STATA SE software, version 15 (College Station, TX), while multivariate  
12  
13 analyses were performed in SAS Version 9.4 (SAS Institute Inc.).  
14  
15

### 16 17 **Patient and Public Involvement**

18  
19 Patients or the public were not involved in the design, or conduct, or reporting, or  
20  
21 dissemination plans of the C3 Study.  
22  
23

## 24 25 26 **RESULTS**

27  
28 A total of 733 participants were originally approached to participate in Wave 1 of the C3  
29  
30 survey, of which 630 completed the survey for an initial cooperation rate of 85.9% (630/733).[7]  
31  
32 At Wave 3, 565 participants were retained for analysis. Of the 630 participants who originally  
33  
34 completed the survey at Wave 1 and were eligible for participation in Wave 3, 47 were unable to  
35  
36 be contacted and 18 declined participation, resulting in a cooperation rate of 77.1% (565/733) for  
37  
38 this study wave and a retention rate of 89.7% (565/630) from Wave 1 – Wave 3.  
39  
40  
41

42  
43 Participant characteristics, overall and by the presence of clinically-relevant anxiety and  
44  
45 depression, are listed in Table 2. Our sample was older, primarily female, and diverse by  
46  
47 race/ethnicity and socioeconomic status. All participants had at least one chronic health condition,  
48  
49 while nearly two-thirds reported having three or more. Approximately a quarter of participants  
50  
51 self-rated their health as fair to poor.  
52  
53

54 *Table 2. Sample Characteristics, Overall and by Clinically-relevant Anxiety and Depressive*  
55 *Symptoms*  
56  
57  
58  
59

## MENTAL HEALTH &amp; COVID-19 IN HIGH RISK ADULTS

14

| Variable                             | Wave 3 C3<br>Sample<br>N=565 | Clinically-relevant Anxiety<br>Symptoms<br>N=81 |             |         | Clinically-relevant Depressive<br>Symptoms<br>N=84 |             |         |
|--------------------------------------|------------------------------|-------------------------------------------------|-------------|---------|----------------------------------------------------|-------------|---------|
|                                      |                              | Yes                                             | No          | p-value | Yes                                                | No          | p-value |
| Age, M (SD)                          | 62.3 (10.9)                  | 61.2 (10.1)                                     | 62.5 (11.0) | 0.31    | 62.5 (11.5)                                        | 62.3 (10.8) | 0.87    |
| Age Group, %                         |                              |                                                 |             | 0.33    |                                                    |             | 0.99    |
| < 60                                 | 36.3                         | 40.7                                            | 35.7        |         | 35.7                                               | 36.5        |         |
| 60 - 69                              | 37.0                         | 39.5                                            | 36.7        |         | 36.9                                               | 36.7        |         |
| ≥ 70                                 | 26.7                         | 19.8                                            | 27.6        |         | 27.4                                               | 26.7        |         |
| Gender, %                            |                              |                                                 |             | <0.001  |                                                    |             | <0.001  |
| Female                               | 61.4                         | 81.7                                            | 57.9        |         | 78.6                                               | 58.3        |         |
| Male                                 | 38.6                         | 18.5                                            | 42.1        |         | 21.4                                               | 41.8        |         |
| Race, %                              |                              |                                                 |             | 0.06    |                                                    |             | 0.08    |
| Latinx                               | 21.9                         | 30.0                                            | 20.4        |         | 31.3                                               | 20.3        |         |
| Non-Latinx White                     | 45.1                         | 36.3                                            | 46.5        |         | 34.9                                               | 46.8        |         |
| Non- Latinx Black                    | 29.8                         | 27.5                                            | 30.3        |         | 28.9                                               | 29.9        |         |
| Other                                | 3.2                          | 6.3                                             | 2.7         |         | 4.8                                                | 2.3         |         |
| Below Poverty Level, %               |                              |                                                 |             | 0.003   |                                                    |             | 0.001   |
| Yes                                  | 29.2                         | 43.2                                            | 26.7        |         | 44.1                                               | 26.5        |         |
| No                                   | 70.8                         | 56.8                                            | 73.3        |         | 55.9                                               | 73.5        |         |
| Marital Status, %                    |                              |                                                 |             | 0.29    |                                                    |             | 0.06    |
| Married                              | 39.9                         | 34.3                                            | 40.9        |         | 30.3                                               | 41.7        |         |
| Unmarried                            | 60.1                         | 65.7                                            | 59.1        |         | 69.7                                               | 58.3        |         |
| Health Insurance, %                  |                              |                                                 |             | 0.007   |                                                    |             | 0.008   |
| Medicare                             | 16.1                         | 11.1                                            | 16.8        |         | 16.7                                               | 16.1        |         |
| Medicaid                             | 12.8                         | 23.5                                            | 11.0        |         | 22.6                                               | 11.1        |         |
| Private                              | 25.0                         | 18.5                                            | 26.2        |         | 15.5                                               | 26.6        |         |
| Medicare + Private                   | 29.6                         | 24.7                                            | 30.4        |         | 23.8                                               | 30.8        |         |
| Medicare + Medicaid                  | 16.5                         | 22.2                                            | 15.6        |         | 21.4                                               | 15.5        |         |
| Self-pay/None                        | 0.0                          | 0.0                                             | 0.0         |         | 0.0                                                | 0.0         |         |
| Primary Care Setting, %              |                              |                                                 |             | 0.006   |                                                    |             | 0.006   |
| Academic                             | 68.7                         | 55.6                                            | 71.0        |         | 56.0                                               | 71.0        |         |
| Federally Qualified<br>Health Center | 31.3                         | 44.4                                            | 29.1        |         | 44.1                                               | 29.0        |         |
| Employment Status, %                 |                              |                                                 |             | 0.15    |                                                    |             | 0.03    |
| Working for Pay                      | 30.1                         | 23.5                                            | 31.4        |         | 20.2                                               | 31.8        |         |
| Not Working<br>(Retired/Unemployed)  | 69.9                         | 76.5                                            | 68.6        |         | 79.8                                               | 68.2        |         |
| Health Literacy, %                   |                              |                                                 |             | 0.13    |                                                    |             | 0.05    |
| Low                                  | 23.4                         | 28.4                                            | 22.4        |         | 27.4                                               | 22.8        |         |
| Marginal                             | 23.2                         | 28.4                                            | 22.2        |         | 31.0                                               | 21.7        |         |
| Adequate                             | 53.4                         | 43.2                                            | 55.4        |         | 41.7                                               | 55.5        |         |
| Health Activation, %                 |                              |                                                 |             | <0.001  |                                                    |             | 0.02    |
| Low                                  | 47.6                         | 70.4                                            | 43.8        |         | 59.5                                               | 45.3        |         |
| Adequate                             | 52.4                         | 29.6                                            | 56.2        |         | 40.5                                               | 54.7        |         |
| # Chronic Conditions, %              |                              |                                                 |             | 0.03    |                                                    |             | 0.05    |
| 1                                    | 24.2                         | 35.8                                            | 22.4        |         | 34.5                                               | 22.3        |         |
| 2                                    | 16.5                         | 13.6                                            | 16.8        |         | 11.9                                               | 17.1        |         |
| 3 or more                            | 59.3                         | 50.6                                            | 60.8        |         | 53.6                                               | 60.5        |         |
| Self-Reported Health, %              |                              |                                                 |             | 0.21    |                                                    |             | 0.02    |
| Excellent                            | 9.0                          | 6.2                                             | 9.5         |         | 4.8                                                | 9.8         |         |
| Very Good                            | 29.9                         | 37.0                                            | 28.6        |         | 27.4                                               | 30.3        |         |
| Good                                 | 39.7                         | 33.3                                            | 40.7        |         | 34.5                                               | 40.5        |         |
| Fair                                 | 17.9                         | 22.2                                            | 17.2        |         | 25.0                                               | 16.7        |         |
| Poor                                 | 3.5                          | 1.2                                             | 3.9         |         | 8.3                                                | 2.7         |         |

Approximately 14% (81/563) of the sample reported the presence of clinically-relevant anxiety symptoms, while roughly 15% (84/563) endorsed significant depressive symptoms (Table 3). In multivariate models (Table 4), female gender (RR 2.34, 95% Confidence Interval (CI) 1.32 – 4.13) and low health activation (RR 2.32, 95% CI 1.44 – 3.76) were independently associated with the presence of anxiety, while female gender (RR 1.95, 95% CI 1.14 – 3.33) was significantly associated with depression.

### COVID-Related Emotional Distress

In bivariate analyses, anxiety and depression were both associated with more worry about contracting COVID-19, in addition to greater stress and loneliness as a result of the virus (Table 3). These associations remained significant in multivariate analyses (Table 4; Anxiety - Worry: RR 2.32, 95% CI 1.52 – 3.53; Stress: RR 4.93, 95% CI 3.20 – 7.59; Lonely: RR 3.82, 95% CI 2.21 – 6.60) (Depression - Worry: RR 1.67, 95% CI 1.10 – 2.54; Stress: RR 3.01, 1.96 – 4.61; Lonely: RR 5.37, 95% CI 3.21 – 8.98).

*Table 3. Associations with COVID-related Emotional Distress, Health Self-Management and Healthcare Utilization, Overall and by Clinically-relevant Anxiety and Depressive Symptoms*

| Variable                                                                                         | Wave 3 C3<br>Sample<br>N=565 | Clinically-relevant Anxiety<br>Symptoms<br>N=81 |      |         | Clinically-relevant Depressive<br>Symptoms<br>N=84 |      |         |
|--------------------------------------------------------------------------------------------------|------------------------------|-------------------------------------------------|------|---------|----------------------------------------------------|------|---------|
|                                                                                                  |                              | Yes                                             | No   | p-value | Yes                                                | No   | p-value |
| <b>COVID-related Emotional Distress</b>                                                          |                              |                                                 |      |         |                                                    |      |         |
| How worried are you about getting the coronavirus?, %                                            |                              |                                                 |      | <0.001  |                                                    |      | 0.01    |
| Not worried at all                                                                               | 10.7                         | 4.2                                             | 11.7 |         | 10.4                                               | 10.7 |         |
| A little worried                                                                                 | 22.8                         | 12.5                                            | 24.6 |         | 15.6                                               | 23.9 |         |
| Somewhat worried                                                                                 | 39.9                         | 34.7                                            | 40.7 |         | 32.5                                               | 41.2 |         |
| Very worried                                                                                     | 26.6                         | 48.6                                            | 23.0 |         | 41.7                                               | 24.2 |         |
| Over the past week, how often have you felt nervous or "stressed" because of the coronavirus?, % |                              |                                                 |      | <0.001  |                                                    |      | <0.001  |
| Never                                                                                            | 27.8                         | 4.9                                             | 31.7 |         | 7.1                                                | 31.5 |         |
| Some of the time                                                                                 | 54.0                         | 37.0                                            | 56.6 |         | 48.8                                               | 54.7 |         |
| Most of the time                                                                                 | 13.8                         | 40.7                                            | 9.3  |         | 26.2                                               | 11.7 |         |
| All of the time                                                                                  | 4.4                          | 17.3                                            | 2.3  |         | 17.9                                               | 2.1  |         |
| Over the past week, how often have you felt alone or lonely because of the coronavirus?, %       |                              |                                                 |      | <0.001  |                                                    |      | <0.001  |
| Never                                                                                            | 53.3                         | 19.8                                            | 59.1 |         | 19.1                                               | 59.5 |         |
| Some of the time                                                                                 | 34.5                         | 46.9                                            | 32.2 |         | 41.7                                               | 33.0 |         |
| Most of the time                                                                                 | 9.2                          | 23.5                                            | 6.9  |         | 23.8                                               | 6.7  |         |



## MENTAL HEALTH &amp; COVID-19 IN HIGH RISK ADULTS

16

|                                                                                                                                                     |            |            |            |        |            |            |        |
|-----------------------------------------------------------------------------------------------------------------------------------------------------|------------|------------|------------|--------|------------|------------|--------|
| All of the time                                                                                                                                     | 3.0        | 9.9        | 1.9        |        | 15.5       | 0.8        |        |
| <b>Health Self-Management</b>                                                                                                                       |            |            |            |        |            |            |        |
| Difficulty managing health due to the coronavirus (1-10), M (SD)                                                                                    | 4.1 (3.3)  | 5.8 (3.2)  | 3.8 (3.2)  | <0.001 | 5.8 (3.4)  | 3.8 (3.2)  | <0.001 |
| Difficulty with medications due to the coronavirus (1-10), M (SD)                                                                                   | 2.5 (2.9)  | 3.8 (3.3)  | 2.3 (2.7)  | <0.001 | 3.8 (3.4)  | 2.3 (2.7)  | <0.001 |
| ASK-12 total score (12-60), M (SD)                                                                                                                  | 20.2 (5.2) | 22.6 (5.7) | 19.8 (5.0) | <0.001 | 23.1 (5.3) | 19.7 (5.0) | <0.001 |
| Thinking about the last month, would you say your physical activity was more, less, or about the same than what is typical for you?, %              |            |            |            | 0.12   |            |            | 0.15   |
| More than typical                                                                                                                                   | 17.0       | 12.4       | 17.8       |        | 9.5        | 18.2       |        |
| Less than typical                                                                                                                                   | 54.9       | 65.4       | 53.1       |        | 60.7       | 54.1       |        |
| The same                                                                                                                                            | 28.1       | 22.2       | 29.1       |        | 29.8       | 27.8       |        |
| Thinking about the last month, would you say your alcohol consumption was more, less, or about the same than what is typical for you?, %            |            |            |            | 0.13   |            |            | 0.07   |
| More than typical                                                                                                                                   | 9.0        | 14.8       | 7.9        |        | 14.3       | 8.2        |        |
| Less than typical                                                                                                                                   | 23.8       | 22.2       | 24.1       |        | 28.6       | 22.8       |        |
| The same                                                                                                                                            | 67.2       | 63.0       | 68.0       |        | 57.1       | 69.0       |        |
| <b>Healthcare Utilization</b>                                                                                                                       |            |            |            |        |            |            |        |
| Over the past month, have you chosen to miss or cancel any medical appointments because you were too worried about getting the coronavirus?, %      |            |            |            | <0.001 |            |            | 0.01   |
| Yes                                                                                                                                                 | 22.0       | 38.3       | 19.3       |        | 32.1       | 20.1       |        |
| No                                                                                                                                                  | 78.0       | 61.7       | 80.7       |        | 67.9       | 79.9       |        |
| Over the past month, have you needed to go to the Emergency Room or urgent care but were too worried about getting the coronavirus to seek care?, % |            |            |            | 0.06   |            |            | 0.002  |
| Yes                                                                                                                                                 | 3.7        | 7.4        | 3.1        |        | 9.5        | 2.7        |        |
| No                                                                                                                                                  | 96.3       | 92.6       | 96.9       |        | 90.5       | 97.3       |        |
| Comfortable visiting your doctor in person once SIP lifted, %                                                                                       |            |            |            | <0.001 |            |            | 0.004  |
| Very comfortable                                                                                                                                    | 36.9       | 18.5       | 40.0       |        | 25.0       | 39.2       |        |
| Somewhat comfortable                                                                                                                                | 42.1       | 48.2       | 41.3       |        | 44.1       | 41.5       |        |
| Not that comfortable                                                                                                                                | 16.5       | 24.7       | 15.0       |        | 20.2       | 15.9       |        |
| Not comfortable at all                                                                                                                              | 4.4        | 8.6        | 3.8        |        | 10.7       | 3.4        |        |

SIP = Shelter-in-place

*Table 4. Multivariate Associations between Clinically Relevant Anxiety and Depressive Symptoms and COVID-related Outcomes*

| Variable                                                       | Clinically-relevant Anxiety Symptoms |                  |         | Clinically-relevant Depressive Symptoms |                  |         |
|----------------------------------------------------------------|--------------------------------------|------------------|---------|-----------------------------------------|------------------|---------|
|                                                                | Yes                                  | No               | P-value | Yes                                     | No               | P-value |
| <b>COVID-related Emotional Distress</b>                        | Summary Value                        | Summary Value    |         | Summary Value                           | Summary Value    |         |
| Very worried about COVID 19, RR (95% CI)                       | 2.32 (1.52,3.53)                     | REF              | <0.001  | 1.67 (1.10,2.54)                        | REF              | 0.02    |
| Stressed due to COVID-19, RR (95% CI)                          | 4.93 (3.20,7.59)                     | -                | <0.001  | 3.01 (1.96,4.61)                        | -                | <0.001  |
| Lonely due to COVID-19, RR (95% CI)                            | 3.82 (2.21,6.60)                     | -                | <0.001  | 5.37 (3.21,8.98)                        | -                | <0.001  |
| <b>Health Self-Management</b>                                  |                                      |                  |         |                                         |                  |         |
| Difficulty managing health due to COVID-19, LS Means (95% CI)  | 6.09 (5.25,6.92)                     | 4.23 (3.70,4.75) | <0.001  | 5.85 (5.04,6.65)                        | 4.22 (3.70,4.75) | <0.001  |
| Difficulty with medications due to COVID-19, LS Means (95% CI) | 3.71 (2.98,4.43)                     | 2.47 (2.02,2.92) | <0.001  | 3.62 (2.92,4.31)                        | 2.45 (2.00,2.91) | <0.001  |
| ASK-12 Total Score,                                            | 21.8 (20.6,23.0)                     | 20.2 (19.4,21.0) | 0.01    | 22.3 (21.1,23.5)                        | 20.0 (19.3,20.8) | <0.001  |

## MENTAL HEALTH &amp; COVID-19 IN HIGH RISK ADULTS

17

| LS Means (95% CI)                                                                    |                  |   |      |                  |   |      |  |
|--------------------------------------------------------------------------------------|------------------|---|------|------------------|---|------|--|
| <b>Healthcare Utilization</b>                                                        |                  |   |      |                  |   |      |  |
| Missed or cancelled doctor appointment/Avoided ER visit due to COVID-19, RR (95% CI) | 1.62 (1.06,2.49) | - | 0.03 | 1.54 (1.00,2.36) | - | 0.05 |  |
| Very comfortable visiting doctor after SIP lifted, RR (95% CI)                       | 0.54 (0.31,0.93) | - | 0.03 | 0.71 (0.44,1.13) | - | 0.14 |  |

+ Models have been adjusted for age, gender, race, poverty level, health literacy, health activation, self-reported overall health, study and date of interview

RR = Relative Risk; CI = Confidence Interval; LS = Least Square; SIP = Shelter-in-place

### Self-Management of Health

Both anxiety and depression were associated with greater reported difficulty managing health and medications during COVID-19, in addition to more barriers to medication adherence (Table 3). All associations remained significant in multivariate analyses (Table 4; Anxiety - Managing health: LS Means 6.09, 95% CI 5.25 – 6.92 vs. 4.23, 95% CI 3.70 – 4.75; Managing medications: LS Means 3.71, 95% CI 2.98 – 4.43 vs. 2.47, 95% CI 2.02 – 2.92; Medication adherence: LS Means 21.8, 95% CI 20.6 – 23.0 vs. 20.2, 95% CI 19.4 – 21.0) (Depression - Managing health: LS Means 5.85, 95% CI 5.04 – 6.65 vs. 4.22, 95% CI 3.84 – 4.70; Managing medications: LS Means 3.62, 95% CI 2.92 – 4.31 vs. 2.45, 95% CI 2.00 – 2.91; Medication adherence: LS Means 22.3, 95% CI 21.1– 23.5 vs. 20.0, 95% CI 19.3 – 20.8). Bivariate associations between anxiety and depressive symptoms with change in physical activity and alcohol use were non-significant.

### Healthcare Utilization

In bivariate analyses, both anxiety and depression were associated with avoidance of routine medical visits, as well as less comfort visiting the doctor once SIP is lifted (Table 3). Depression alone was associated with avoidance of emergency care. For anxiety, associations with avoiding doctor's visits (RR 1.62, 95% CI 1.06 – 2.49) and feeling very comfortable visiting the doctor after SIP ends (RR 0.54, 95% CI 0.31 – 0.93)–were significant in multivariate analyses

(Table 3). For depression, only avoidance of doctor's visits (RR 1.54, 95% CI 1.00 – 2.36) remained significant in multivariate analysis (Table 4).

## DISCUSSION

Among a sample of mostly middle to older-age adults with one or more chronic conditions surveyed in the early phases of the COVID-19 crisis in the U.S. – when cases were rising and a SIP order was in effect in most states – clinically-relevant anxiety and depressive symptoms were relatively common, with rates of 14 and 15%, respectively. While still considerable, it should be noted estimates observed in this sample were slightly lower as compared to rates of clinically elevated distress reported among the general population in the U.S. during comparable stages of the pandemic, which have ranged from 20-45%.[20-23] Differences in samples, measurement, or clinical thresholds among studies may in part help to explain this discrepancy. Additionally, the generally older age of our sample's participants may also account for these differences. Studies examining age differences in mental health symptoms have found older adults are reporting fewer symptoms of anxiety and depression in response to the COVID-19 pandemic compared to their younger counterparts,[24] despite their greater COVID-19 risk. Possible age-related protective factors may be a lower perceived socio-economic impact of the pandemic, as well as older adults' tendency to display greater resiliency in the face of acute stress due to accumulated experience navigating other life stressors.

This investigation also helps to elucidate possible risk factors contributing increased mental health risk during the COVID-19 pandemic. Consistent with prior research among the general population,[25] women reported a higher mental health burden after accounting for additional sociodemographic factors, with a nearly two to threefold increase in risk. This may reflect the

1  
2  
3 disproportionate challenges women have faced in regard to family caretaking, household  
4 responsibilities, and job loss as a result of the pandemic.[26] Low health activation was also a  
5  
6 associated with significant anxiety symptoms. In the context of the COVID-19 pandemic,  
7  
8 psychosocial characteristics such as lower confidence in managing physical or mental health, less  
9  
10 ability to engage in problem-solving around new health challenges, and/or greater passivity  
11  
12 communicating personal health needs may have contributed to higher levels of uncertainty or  
13  
14 distress.  
15  
16  
17  
18

19  
20 Interestingly, while all adults in this sample had at least one chronic medical condition,  
21  
22 neither greater medical comorbidity nor poorer self-reported health were associated with  
23  
24 significant anxiety and depressive symptoms after adjusting for other sociodemographic and  
25  
26 health-related factors. It could be that personal health plays a lesser role in mental health  
27  
28 functioning during the pandemic than expected, or that no additional risk to mental health was  
29  
30 conferred by having more than one medical condition. Alternatively, it may also be that our sample  
31  
32 did not consider themselves to be at higher COVID-19 risk due to their health conditions, which  
33  
34 may have served as a protective factor against psychosocial distress. This could have been due to  
35  
36 general perceptions of their health or medical illness, as over three-quarters of our sample self-  
37  
38 reported their health as at least 'good', despite a similar amount reporting the presence of at least  
39  
40 two chronic conditions. However, it may also be that the rapidly changing, and often conflicting,  
41  
42 public health messaging around risk and prevention in the early stages of the pandemic contributed  
43  
44 to confusion around personal susceptibility.[27] Future studies may consider understanding of and  
45  
46 perceptions of personal risk as a possible mediating factor between multimorbidity and a high  
47  
48 mental health burden.  
49  
50  
51  
52  
53  
54  
55  
56  
57  
58  
59  
60

1  
2  
3 As expected, the presence of significant anxiety and depressive symptoms were both  
4 associated with higher rates of COVID-related emotional distress. Specifically, respondents with  
5 clinically-relevant symptoms were much more likely to report they were very worried about  
6 contracting COVID-19, and three to five times as likely to endorse feelings of stress and loneliness  
7 as a result of the pandemic. Worry and stress were particularly high for individuals with anxiety,  
8 while loneliness was elevated in those with depression. These findings support the need for  
9 targeted mental health screening among adults with underlying medical conditions reporting high  
10 levels of isolation or worry and stress related to the pandemic. Conversely, clinicians should be  
11 aware that adults with pre-existing anxiety or depressive disorders may be at increased risk of  
12 COVID-specific emotional distress.  
13  
14  
15  
16  
17  
18  
19  
20  
21  
22  
23  
24  
25

26 Finally, our results indicate that a high mental health burden may also translate to increased  
27 difficulty managing health and maintaining access to routine and emergency medical services  
28 during the pandemic among those with pre-existing medical conditions. Both anxiety and  
29 depression were separately associated with greater self-reported difficulty managing health and  
30 medications, more barriers to medication adherence, as well as greater avoidance of the doctor due  
31 to worry about contracting COVID-19. Those with high levels of anxiety, in particular, also  
32 reported less comfort returning to the doctor once stay-at-home restrictions ended, indicating  
33 concerns about COVID-19 may continue to impact healthcare service use even after restrictions  
34 are lifted and the acute crisis improves. While our sample overall reported less physical activity,  
35 alcohol use remained relatively stable; furthermore, a higher mental health burden was not  
36 associated change in either of these behaviors. Taken together, these findings have particular  
37 relevance to clinicians and public health authorities alike. As vaccine availability remains limited  
38 and hesitancy high,[28] and treatments for early disease are still in development, optimization of  
39  
40  
41  
42  
43  
44  
45  
46  
47  
48  
49  
50  
51  
52  
53  
54  
55  
56  
57  
58  
59  
60

1  
2  
3 health and chronic disease status among those with multimorbidity remains a potentially important  
4  
5 barrier against infection and serious illness. Thus, any psycho-behavioral factors impacting  
6  
7 adequate chronic disease management among this population should be addressed.  
8  
9

10  
11 There are several limitations which should be noted. Foremost, this study was cross-  
12  
13 sectional, which prevents the ability to infer causation. It is not clear whether a high mental health  
14  
15 burden led to higher rate of COVID-related distress and maladaptive health behaviors observed,  
16  
17 or vice versa. As information on mental health functioning prior to the pandemic was not currently  
18  
19 available for the full sample, it is difficult to determine whether any psychological distress and its  
20  
21 associated impact are a result of the pandemic, or merely a continuation or exacerbation of a  
22  
23 previous condition. Furthermore, while all participants in our sample had at least one underlying  
24  
25 chronic medical condition, comprehensive data regarding condition type was not available for  
26  
27 analysis. Different medical conditions may have had differing effects on both the presence of  
28  
29 mental health symptoms, as well as health self-management and utilization. This assessment was  
30  
31 also conducted at the initial stages of the crisis; it is unclear how these findings may change as the  
32  
33 pandemic progresses. Additional analyses with follow-up survey waves of the C3 cohort will  
34  
35 therefore be necessary. Given the sample was also primarily older, female, and with chronic  
36  
37 medical conditions this limits generalizability to the broader population, although it should be  
38  
39 noted this latter characteristic was an intentional methodological choice given the heightened  
40  
41 COVID-19 risk chronic conditions confer. However, the diversity of the sample with regard to  
42  
43 race/ethnicity, socioeconomic status, and health literacy should also be noted.  
44  
45  
46  
47  
48

## 49 **Conclusion**

50  
51 Within a sample consisting of primarily older adults with underlying medical conditions,  
52  
53 clinically-relevant symptoms of anxiety and depression were relatively common during the early  
54  
55  
56  
57  
58  
59

1  
2  
3 stages of the COVID-19 pandemic in the U.S., with women and those with low health activation  
4  
5 disproportionately exhibiting greater risk. Importantly, a high mental health burden may also  
6  
7 interfere with the ability to sufficiently manage health during the pandemic. At a time when it is  
8  
9 of the utmost importance that individuals with underlying conditions adequately self-manage their  
10  
11 health to minimize COVID-19 risk, factors which may interfere with this ability should be  
12  
13 addressed, including mental health. As the COVID-19 crisis continues and daily life remains  
14  
15 drastically altered, findings from this study reinforce the need for increased awareness surrounding  
16  
17 the mental health risks associated with the COVID-19 pandemic among individuals with  
18  
19 underlying medical conditions. Health systems and practitioners should respond accordingly  
20  
21 through enhanced screening and provision of mental health resources for individuals at high  
22  
23 COVID-19 risk.  
24  
25  
26  
27  
28  
29  
30  
31  
32  
33  
34  
35  
36  
37  
38  
39  
40  
41  
42  
43  
44  
45  
46  
47  
48  
49  
50  
51  
52  
53  
54  
55  
56  
57  
58  
59  
60

**AUTHOR CONTRIBUTIONS**

RML contributed to manuscript conception, design of the work, data analysis, interpretation of data, as well as drafted the manuscript and revised it following author feedback. LO contributed to manuscript conception, data analysis, interpretation of data, and editing of manuscript drafts. AR, EY, SWL, MS and SCB contributed to manuscript conception, interpretation of data, and editing of manuscript drafts. MSW contributed to manuscript conception, design of the work, interpretation of data, and editing of manuscript drafts. All authors have approved the submitted version.



## REFERENCES

1. Centers for Disease Control and Prevention [Internet]. COVID Data Tracker: United States COVID-19 Cases and Deaths by State. [Date accessed 2021 10 Feb]. Available from: <https://covid.cdc.gov/covid-data-tracker/#datatracker-home>.
2. Nicola M, Alsafi Z, Sohrabi C, et al. The socio-economic implications of the coronavirus pandemic (COVID-19): A review. *Int J Surg* 2020;78:185-93.
3. American Psychological Association [Internet]. Stress in America 2020: A National Mental Health Crisis. [Date accessed 2021 10 Feb]. Available from: <https://www.apa.org/news/press/releases/stress/2020/report-october>
4. Czeisler MÉ, Lane RI, Petrosky E, et al. Mental health, substance use, and suicidal ideation during the COVID-19 pandemic - United States, June 24-30, 2020. *MMWR: Morbidity & Mortality Weekly Report* 2020;69(32):1049-57.
5. Centers for Disease Control and Prevention [Internet]. COVID-19: Your Health: People with Certain Medical Conditions. [Date accessed 2021 10 Feb]. Available from: [https://www.cdc.gov/coronavirus/2019-ncov/need-extra-precautions/people-with-medical-conditions.html?CDC\\_AA\\_refVal=https%3A%2F%2Fwww.cdc.gov%2Fcoronavirus%2F2019-ncov%2Fneed-extra-precautions%2Fgroups-at-higher-risk.html](https://www.cdc.gov/coronavirus/2019-ncov/need-extra-precautions/people-with-medical-conditions.html?CDC_AA_refVal=https%3A%2F%2Fwww.cdc.gov%2Fcoronavirus%2F2019-ncov%2Fneed-extra-precautions%2Fgroups-at-higher-risk.html)
6. Wong SYS, Zhang D, Sit RWS, et al. Impact of COVID-19 on loneliness, mental health, and health service utilisation: a prospective cohort study of older adults with multimorbidity in primary care. *Br J Gen Pract* 2020;70(700):e817-e24.

7. Wolf MS, Serper M, Opsasnick L, et al. Awareness, attitudes, and actions related to COVID-19 among adults with chronic conditions at the onset of the U.S. outbreak: A cross-sectional survey. *Ann Intern Med* 2020;173(2):100-9.
8. O'Connor R, Arvanitis M, Wismer G, et al. Rationale and design of the regimen education and messaging in diabetes (REMinD) trial. *Contemp Clin Trials* 2019;83:46-52.
9. Wolf MS, Curtis LM, Wilson EA, et al. Literacy, cognitive function, and health: results of the LitCog study. *J Gen Intern Med*. 2012;27(10):1300-7.
10. Bailey SC, Wismer GA, Parker RM, et al. Development and rationale for a multifactorial, randomized controlled trial to test strategies to promote adherence to complex drug regimens among older adults. *Contemp Clin Trials* 2017;62:21-6.
11. Weiss BD, Mays MZ, Martz W, et al. Quick assessment of literacy in primary care: the newest vital sign. *Ann Fam Med* 2005;3(6):514-22.
12. Wolf MS, Smith SG, Pandit AU, et al. Development and validation of the consumer health activation index. *Med Decis Making* 2018;38(3):334-43.
13. Smith SG, Curtis LM, Wardle J, et al. Skill set or mind set? Associations between health literacy, patient activation and health. *PloS One* 2013;8(9):e74373.
14. Cella D, Riley W, Stone A, et al. The Patient-Reported Outcomes Measurement Information System (PROMIS) developed and tested its first wave of adult self-reported health outcome item banks: 2005-2008. *J Clin Epidemiol* 2010;63(11):1179-94.
15. Choi SW, Schalet B, Cook KF, et al. Establishing a common metric for depressive symptoms: linking the BDI-II, CES-D, and PHQ-9 to PROMIS depression. *Psychol Assess* 2014;26(2):513-27.

16. Schalet BD, Cook KF, Choi SW, et al. Establishing a common metric for self-reported anxiety: linking the MASQ, PANAS, and GAD-7 to PROMIS Anxiety. *J Anxiety Disord* 2014;28(1):88-96.
17. Schalet BD, Pilkonis PA, Yu L, et al. Clinical validity of PROMIS Depression, Anxiety, Anger across diverse clinical samples. *J Clin Epidemiol* 2006;73:119-27.
18. Matza LS, Park J, Coyne KS, et al. Derivation and validation of the ASK-12 adherence barrier survey. *Ann Pharmacother* 2009;43(10):1621-30.
19. Zou G. A modified poisson regression approach to prospective studies with binary data. *Am J Epidemiol* 2004;159(7):702-6.
20. Centers for Disease Control and Prevention [Internet]. National Center for Health Statistics. Mental Health: Household Pulse Survey. [Date accessed 10 Feb 2021]. Available from: <https://www.cdc.gov/nchs/covid19/pulse/mental-health.htm>.
21. Bryan CJ, Bryan AO, Baker JC. Associations among state-level physical distancing measures and suicidal thoughts and behaviors among U.S. adults during the early COVID-19 pandemic. *Suicide Life-Threat Behav* 2020. [Epub ahead of print].
22. Liu CH, Zhang E, Wong GTF, et al. Factors associated with depression, anxiety, and PTSD symptomatology during the COVID-19 pandemic: Clinical implications for U.S. young adult mental health. *Psychiatry Res* 2020;290:113172.
23. Fitzpatrick KM, Harris C, Drawve G. Fear of COVID-19 and the mental health consequences in America. *Psycholog Trauma* 2020. [Epub ahead of print].
24. Bruine de Bruin W. Age differences in COVID-19 risk perceptions and mental health: Evidence from a national US survey conducted in March 2020. *J Gerontol B Psychol Sci Soc Sci* 2020. [Epub ahead of print].

- 1  
2  
3  
4  
5  
6  
7  
8  
9  
10  
11  
12  
13  
14  
15  
16  
17  
18  
19  
20  
21  
22  
23  
24  
25  
26  
27  
28  
29  
30  
31  
32  
33  
34  
35  
36  
37  
38  
39  
40  
41  
42  
43  
44  
45  
46  
47  
48  
49  
50  
51  
52  
53  
54  
55  
56  
57  
58  
59  
60
25. Pierce M, Hope H, Ford T, et al. Mental health before and during the COVID-19 pandemic: a longitudinal probability sample survey of the UK population. *Lancet Psychiatry* 2020. [Epub ahead of print].
26. Adams-Prassl AB, Golin, M, Rauh, C. Inequality in the impact of the coronavirus shock: Evidence from real time surveys. Cambridge Working Papers in Economics: 2032. 2020;Cambridge-INET Working Paper Series No: 2020/18.
27. American Public Health Association [Internet]. Countering the “infodemic” of misinformation. [Date accessed 10 Feb 2021]. Available from: <https://www.apha.org/covid19>.
28. Khubchandani J, Sharma S, Price JH, et al. COVID-19 Vaccination Hesitancy in the United States: A Rapid National Assessment. *J Community Health* 2021:1-8.

**STROBE 2007 (v4) checklist of items to be included in reports of observational studies in epidemiology\***  
**Checklist for cohort, case-control, and cross-sectional studies (combined)**

| Section/Topic             | Item # | Recommendation                                                                                                                                                                                                                                                                                                                                                                                                                                                         | Reported on page #       |
|---------------------------|--------|------------------------------------------------------------------------------------------------------------------------------------------------------------------------------------------------------------------------------------------------------------------------------------------------------------------------------------------------------------------------------------------------------------------------------------------------------------------------|--------------------------|
| Title and abstract        | 1      | (a) Indicate the study's design with a commonly used term in the title or the abstract                                                                                                                                                                                                                                                                                                                                                                                 | 1                        |
|                           |        | (b) Provide in the abstract an informative and balanced summary of what was done and what was found                                                                                                                                                                                                                                                                                                                                                                    | 2-3                      |
| <b>Introduction</b>       |        |                                                                                                                                                                                                                                                                                                                                                                                                                                                                        |                          |
| Background/rationale      | 2      | Explain the scientific background and rationale for the investigation being reported                                                                                                                                                                                                                                                                                                                                                                                   | 6-7                      |
| Objectives                | 3      | State specific objectives, including any pre-specified hypotheses                                                                                                                                                                                                                                                                                                                                                                                                      | 7                        |
| <b>Methods</b>            |        |                                                                                                                                                                                                                                                                                                                                                                                                                                                                        |                          |
| Study design              | 4      | Present key elements of study design early in the paper                                                                                                                                                                                                                                                                                                                                                                                                                | 7-8                      |
| Setting                   | 5      | Describe the setting, locations, and relevant dates, including periods of recruitment, exposure, follow-up, and data collection                                                                                                                                                                                                                                                                                                                                        | 7-8                      |
| Participants              | 6      | (a) <i>Cohort study</i> —Give the eligibility criteria, and the sources and methods of selection of participants. Describe methods of follow-up<br><i>Case-control study</i> —Give the eligibility criteria, and the sources and methods of case ascertainment and control selection. Give the rationale for the choice of cases and controls<br><i>Cross-sectional study</i> —Give the eligibility criteria, and the sources and methods of selection of participants | 7-8                      |
|                           |        | (b) <i>Cohort study</i> —For matched studies, give matching criteria and number of exposed and unexposed<br><i>Case-control study</i> —For matched studies, give matching criteria and the number of controls per case                                                                                                                                                                                                                                                 | N/A                      |
| Variables                 | 7      | Clearly define all outcomes, exposures, predictors, potential confounders, and effect modifiers. Give diagnostic criteria, if applicable                                                                                                                                                                                                                                                                                                                               | 8-10                     |
| Data sources/ measurement | 8*     | For each variable of interest, give sources of data and details of methods of assessment (measurement). Describe comparability of assessment methods if there is more than one group                                                                                                                                                                                                                                                                                   | 8-10                     |
| Bias                      | 9      | Describe any efforts to address potential sources of bias                                                                                                                                                                                                                                                                                                                                                                                                              |                          |
| Study size                | 10     | Explain how the study size was arrived at                                                                                                                                                                                                                                                                                                                                                                                                                              | N/A – secondary analysis |
| Quantitative variables    | 11     | Explain how quantitative variables were handled in the analyses. If applicable, describe which groupings were chosen and why                                                                                                                                                                                                                                                                                                                                           | 8-11                     |
| Statistical methods       | 12     | (a) Describe all statistical methods, including those used to control for confounding                                                                                                                                                                                                                                                                                                                                                                                  | 10-11                    |
|                           |        | (b) Describe any methods used to examine subgroups and interactions                                                                                                                                                                                                                                                                                                                                                                                                    | N/A                      |
|                           |        | (c) Explain how missing data were addressed                                                                                                                                                                                                                                                                                                                                                                                                                            | 11                       |
|                           |        | (d) <i>Cohort study</i> —If applicable, explain how loss to follow-up was addressed                                                                                                                                                                                                                                                                                                                                                                                    | N/A                      |

|                          |     |                                                                                                                                                                                                              |       |
|--------------------------|-----|--------------------------------------------------------------------------------------------------------------------------------------------------------------------------------------------------------------|-------|
|                          |     | <i>Case-control study</i> —If applicable, explain how matching of cases and controls was addressed                                                                                                           |       |
|                          |     | <i>Cross-sectional study</i> —If applicable, describe analytical methods taking account of sampling strategy                                                                                                 |       |
|                          |     | (e) Describe any sensitivity analyses                                                                                                                                                                        | N/A   |
| <b>Results</b>           |     |                                                                                                                                                                                                              |       |
| Participants             | 13* | (a) Report numbers of individuals at each stage of study—eg numbers potentially eligible, examined for eligibility, confirmed eligible, included in the study, completing follow-up, and analysed            | 11    |
|                          |     | (b) Give reasons for non-participation at each stage                                                                                                                                                         | 11    |
|                          |     | (c) Consider use of a flow diagram                                                                                                                                                                           | N/A   |
| Descriptive data         | 14* | (a) Give characteristics of study participants (eg demographic, clinical, social) and information on exposures and potential confounders                                                                     | 11-12 |
|                          |     | (b) Indicate number of participants with missing data for each variable of interest                                                                                                                          |       |
|                          |     | (c) <i>Cohort study</i> —Summarise follow-up time (eg, average and total amount)                                                                                                                             | N/A   |
| Outcome data             | 15* | <i>Cohort study</i> —Report numbers of outcome events or summary measures over time                                                                                                                          | N/A   |
|                          |     | <i>Case-control study</i> —Report numbers in each exposure category, or summary measures of exposure                                                                                                         | N/A   |
|                          |     | <i>Cross-sectional study</i> —Report numbers of outcome events or summary measures                                                                                                                           | 12-15 |
| Main results             | 16  | (a) Give unadjusted estimates and, if applicable, confounder-adjusted estimates and their precision (eg, 95% confidence interval). Make clear which confounders were adjusted for and why they were included | 12-15 |
|                          |     | (b) Report category boundaries when continuous variables were categorized                                                                                                                                    |       |
|                          |     | (c) If relevant, consider translating estimates of relative risk into absolute risk for a meaningful time period                                                                                             | N/A   |
| Other analyses           | 17  | Report other analyses done—eg analyses of subgroups and interactions, and sensitivity analyses                                                                                                               | N/A   |
| <b>Discussion</b>        |     |                                                                                                                                                                                                              |       |
| Key results              | 18  | Summarise key results with reference to study objectives                                                                                                                                                     | 15-19 |
| Limitations              | 19  | Discuss limitations of the study, taking into account sources of potential bias or imprecision. Discuss both direction and magnitude of any potential bias                                                   | 18-19 |
| Interpretation           | 20  | Give a cautious overall interpretation of results considering objectives, limitations, multiplicity of analyses, results from similar studies, and other relevant evidence                                   | 15-19 |
| Generalisability         | 21  | Discuss the generalisability (external validity) of the study results                                                                                                                                        | 19    |
| <b>Other information</b> |     |                                                                                                                                                                                                              |       |
| Funding                  | 22  | Give the source of funding and the role of the funders for the present study and, if applicable, for the original study on which the present article is based                                                | 4     |

\*Give information separately for cases and controls in case-control studies and, if applicable, for exposed and unexposed groups in cohort and cross-sectional studies.

1  
2  
3  
4  
5  
6  
7  
8  
9  
10  
11  
12  
13  
14  
15  
16  
17  
18  
19  
20  
21  
22  
23  
24  
25  
26  
27  
28  
29  
30  
31  
32  
33  
34  
35  
36  
37  
38  
39  
40  
41  
42  
43  
44  
45  
46

**Note:** An Explanation and Elaboration article discusses each checklist item and gives methodological background and published examples of transparent reporting. The STROBE checklist is best used in conjunction with this article (freely available on the Web sites of PLoS Medicine at <http://www.plosmedicine.org/>, Annals of Internal Medicine at <http://www.annals.org/>, and Epidemiology at <http://www.epidem.com/>). Information on the STROBE Initiative is available at [www.strobe-statement.org](http://www.strobe-statement.org).

For peer review only
